# Supplementary material
Source: publisher site journal article supplement (https://www.dovepress.com/get_supplementary_file.php?f=193808-TS7.xlsx)
Supplement: Supplementary file 1 [file get_supplementary_file.php]

## Sheet: TableS7
TableS7: GO terms on BP, CC, MF levels enriched of the DEGs between S2 and S3
GO_type	GO_term	Num_Genes	p_adjust	p_value
CC	brush border	6	0.00119388	9.47521e-06
CC	cluster of actin-based cell projections	6	0.00546635	8.67674e-05
CC	brush border membrane	4	0.00547474	0.000130351
CC	apical plasma membrane	7	0.0237263	0.000753217
CC	apical part of cell	7	0.0593751	0.00235616
CC	cell projection membrane	6	0.132852	0.00632627
CC	lysosomal membrane	6	0.132905	0.00843843
CC	lytic vacuole membrane	6	0.132905	0.00843843
CC	integral component of organelle membrane	4	0.163157	0.0116541
CC	intrinsic component of organelle membrane	4	0.195032	0.0155933
CC	vacuolar membrane	6	0.195032	0.0170266
CC	integral component of Golgi membrane	2	0.202818	0.0203011
CC	basolateral plasma membrane	4	0.202818	0.0209256
CC	intrinsic component of Golgi membrane	2	0.216621	0.024836
CC	chloride channel complex	2	0.216621	0.0257882
CC	cortical actin cytoskeleton	2	0.362824	0.0539499
CC	synaptic vesicle	3	0.362824	0.0578627
CC	melanosome membrane	1	0.362824	0.0582218
CC	chitosome	1	0.362824	0.0582218
CC	pigment granule membrane	1	0.362824	0.0582218
CC	inclusion body	2	0.362824	0.0604707
CC	exocytic vesicle	3	0.392473	0.0694246
CC	pseudopodium	1	0.392473	0.0814794
CC	synaptic vesicle membrane	2	0.392473	0.0859427
CC	exocytic vesicle membrane	2	0.392473	0.0859427
CC	integral component of synaptic vesicle membrane	1	0.392473	0.0860623
CC	apicolateral plasma membrane	1	0.392473	0.0906226
CC	costamere	1	0.392473	0.0906226
CC	extracellular matrix	5	0.392473	0.0911815
CC	cortical cytoskeleton	2	0.392473	0.096585
CC	dystrophin-associated glycoprotein complex	1	0.392473	0.0996757
CC	glycoprotein complex	1	0.392473	0.0996757
CC	desmosome	1	0.442063	0.117515
CC	transport vesicle	4	0.442063	0.120169
CC	centriolar satellite	1	0.442063	0.126304
CC	intrinsic component of synaptic vesicle membrane	1	0.442063	0.126304
CC	excitatory synapse	1	0.464007	0.139324
CC	striated muscle thin filament	1	0.464007	0.143621
CC	nuclear transcriptional repressor complex	1	0.464007	0.143621
CC	myofilament	1	0.465876	0.147897
CC	smooth endoplasmic reticulum	1	0.46759	0.152152
CC	basal plasma membrane	1	0.472866	0.160599
CC	Golgi stack	2	0.472866	0.161375
CC	aggresome	1	0.527052	0.189513
CC	membrane raft	3	0.527052	0.191153
CC	membrane microdomain	3	0.527052	0.192416
CC	cell cortex part	2	0.5331	0.198855
CC	membrane region	3	0.541903	0.206439
CC	microtubule organizing center part	2	0.54407	0.211583
CC	basal part of cell	1	0.587088	0.232972
CC	tertiary granule lumen	1	0.594477	0.240622
CC	lateral plasma membrane	1	0.600967	0.251955
CC	intermediate filament	2	0.600967	0.257557
CC	sarcomere	2	0.600967	0.257557
CC	transport vesicle membrane	2	0.602742	0.263102
CC	cornified envelope	1	0.624947	0.277754
CC	clathrin-coated pit	1	0.625657	0.284963
CC	contractile fiber part	2	0.625657	0.28897
CC	presynapse	3	0.625657	0.292966
CC	myofibril	2	0.626204	0.298192
CC	contractile fiber	2	0.657138	0.318414
CC	caveola	1	0.657138	0.323354
CC	intermediate filament cytoskeleton	2	0.658783	0.329392
CC	transcriptional repressor complex	1	0.661911	0.346715
CC	sperm flagellum	1	0.661911	0.346715
CC	9+2 motile cilium	1	0.661911	0.346715
CC	collagen trimer	1	0.662213	0.356481
CC	ruffle membrane	1	0.662213	0.362912
CC	Golgi cisterna membrane	1	0.662213	0.366103
CC	mitotic spindle	1	0.662213	0.372438
CC	cell-cell junction	3	0.662213	0.376228
CC	lysosomal lumen	1	0.662213	0.378711
CC	plasma membrane raft	1	0.662213	0.388004
CC	oxidoreductase complex	1	0.662213	0.406179
CC	melanosome	1	0.662213	0.412118
CC	pigment granule	1	0.662213	0.412118
CC	external side of plasma membrane	2	0.662213	0.416757
CC	cell-cell adherens junction	1	0.662213	0.423821
CC	Golgi cisterna	1	0.662213	0.429585
CC	cell cortex	2	0.662213	0.433929
CC	ion channel complex	2	0.662213	0.435631
CC	actin cytoskeleton	3	0.662213	0.439235
CC	bicellular tight junction	1	0.662213	0.454827
CC	endoplasmic reticulum-Golgi intermediate compartment	1	0.662213	0.460284
CC	occluding junction	1	0.662213	0.462993
CC	ficolin-1-rich granule lumen	1	0.662213	0.462993
CC	Z disc	1	0.662213	0.465688
CC	sarcolemma	1	0.662213	0.473693
CC	centriole	1	0.662213	0.476335
CC	transmembrane transporter complex	2	0.662213	0.477286
CC	fibrillar center	1	0.662213	0.486772
CC	transporter complex	2	0.662213	0.490226
CC	I band	1	0.662213	0.499529
CC	early endosome membrane	1	0.662213	0.499529
CC	neuron projection terminus	1	0.662213	0.502042
CC	apical junction complex	1	0.662213	0.504544
CC	motile cilium	1	0.696897	0.542912
CC	recycling endosome	1	0.696897	0.558759
CC	tertiary granule	1	0.696897	0.558759
CC	ruffle	1	0.696897	0.560978
CC	leading edge membrane	1	0.696897	0.563186
CC	extrinsic component of plasma membrane	1	0.696897	0.574063
CC	cell leading edge	2	0.696897	0.575039
CC	vacuolar lumen	1	0.696897	0.578338
CC	focal adhesion	2	0.696897	0.586299
CC	cell-substrate adherens junction	2	0.696897	0.590465
CC	nucleolar part	1	0.696897	0.59297
CC	cell-substrate junction	2	0.696897	0.597341
CC	ficolin-1-rich granule	1	0.697176	0.603113
CC	lamellipodium	1	0.697671	0.609078
CC	sperm part	1	0.702448	0.618823
CC	endosome membrane	2	0.738836	0.659011
CC	mitochondrial matrix	2	0.738836	0.662607
CC	cytoplasmic region	2	0.75173	0.680137
CC	late endosome	1	0.76444	0.697924
CC	centrosome	2	0.76444	0.705585
CC	endosomal part	2	0.76444	0.709838
CC	extrinsic component of membrane	1	0.810593	0.76556
CC	endocytic vesicle	1	0.810593	0.76556
CC	secretory granule membrane	1	0.820733	0.78165
CC	spindle	1	0.836972	0.803758
CC	early endosome	1	0.839182	0.812542
CC	proteinaceous extracellular matrix	1	0.866977	0.849423
CC	nuclear speck	1	0.866977	0.853216
CC	neuronal cell body	1	0.903487	0.896317
CC	mitochondrial inner membrane	1	0.916406	0.916406
BP	small molecule catabolic process	13	0.000156461	1.12562e-07
BP	monosaccharide metabolic process	10	0.000518179	7.45581e-07
BP	regulation of angiotensin levels in blood	3	0.00689398	2.29708e-05
BP	angiotensin maturation	3	0.00689398	2.29708e-05
BP	cellular anion homeostasis	3	0.00689398	2.97582e-05
BP	cellular monovalent inorganic anion homeostasis	3	0.00689398	2.97582e-05
BP	organic acid catabolic process	8	0.00772732	4.44738e-05
BP	carboxylic acid catabolic process	8	0.00772732	4.44738e-05
BP	regulation of systemic arterial blood pressure by circulatory renin-angiotensin	3	0.0128867	8.34393e-05
BP	hexose metabolic process	7	0.0168247	0.000121041
BP	alpha-amino acid catabolic process	5	0.0175481	0.00013887
BP	regulation of systemic arterial blood pressure by renin-angiotensin	3	0.0230257	0.000229528
BP	monovalent inorganic anion homeostasis	3	0.0230257	0.000229528
BP	inorganic anion transport	6	0.0230257	0.000231913
BP	cellular amino acid catabolic process	5	0.023368	0.000252173
BP	anion transmembrane transport	7	0.0239459	0.000275637
BP	glucose metabolic process	6	0.024653	0.000301511
BP	NAD metabolic process	4	0.0293744	0.000380388
BP	drug catabolic process	5	0.0334618	0.000471425
BP	cellular aldehyde metabolic process	4	0.0334618	0.000493196
BP	gluconeogenesis	4	0.0334618	0.000518326
BP	drug transmembrane transport	4	0.0334618	0.000544355
BP	antibiotic metabolic process	5	0.0334618	0.000557202
BP	hexose biosynthetic process	4	0.0334618	0.00059918
BP	hormone metabolic process	6	0.0334618	0.000627267
BP	alpha-amino acid metabolic process	6	0.0334618	0.000658155
BP	peptide hormone processing	3	0.0334618	0.00068584
BP	endocrine process	4	0.0334618	0.00068861
BP	organic acid transport	7	0.0334618	0.000722197
BP	carboxylic acid transport	7	0.0334618	0.000722197
BP	monosaccharide biosynthetic process	4	0.0352928	0.000787107
BP	regulation of systemic arterial blood pressure by hormone	3	0.0365938	0.000868773
BP	NADH metabolic process	3	0.0365938	0.000868773
BP	regulation of systemic arterial blood pressure	4	0.0365965	0.000895166
BP	response to mercury ion	2	0.0399398	0.00100568
BP	L-phenylalanine metabolic process	2	0.0425799	0.00122532
BP	L-phenylalanine catabolic process	2	0.0425799	0.00122532
BP	xenobiotic glucuronidation	2	0.0425799	0.00122532
BP	erythrose 4-phosphate/phosphoenolpyruvate family amino acid metabolic process	2	0.0425799	0.00122532
BP	erythrose 4-phosphate/phosphoenolpyruvate family amino acid catabolic process	2	0.0425799	0.00122532
BP	nucleoside phosphate catabolic process	5	0.0463056	0.00141204
BP	phosphate ion homeostasis	2	0.0463056	0.00146579
BP	divalent inorganic anion homeostasis	2	0.0463056	0.00146579
BP	trivalent inorganic anion homeostasis	2	0.0463056	0.00146579
BP	regulation of systemic arterial blood pressure mediated by a chemical signal	3	0.0522586	0.00169182
BP	anion homeostasis	3	0.0541979	0.0017936
BP	dicarboxylic acid metabolic process	4	0.0542272	0.00183358
BP	cellular amino acid metabolic process	7	0.0547398	0.00191767
BP	response to antimetabolite	2	0.0547398	0.00200841
BP	NAD biosynthetic process	3	0.0547398	0.00200844
BP	hexose catabolic process	3	0.0547398	0.00200844
BP	fructose metabolic process	2	0.0605873	0.00231016
BP	flavonoid metabolic process	2	0.0605873	0.00231016
BP	drug transport	5	0.0645503	0.00250771
BP	organic hydroxy compound metabolic process	8	0.0671532	0.00265714
BP	monosaccharide catabolic process	3	0.0799211	0.0033204
BP	glycoside metabolic process	2	0.0799211	0.00333484
BP	negative regulation of morphogenesis of an epithelium	2	0.0799211	0.00333484
BP	nicotinamide nucleotide biosynthetic process	4	0.0822092	0.00358821
BP	pyridine nucleotide biosynthetic process	4	0.0822092	0.00358821
BP	glycoprotein metabolic process	7	0.0822092	0.00360774
BP	cellular glucuronidation	2	0.0824289	0.00371556
BP	nucleobase-containing small molecule biosynthetic process	5	0.0824289	0.00373599
BP	pyridine-containing compound biosynthetic process	4	0.0845448	0.00389271
BP	pyruvate metabolic process	4	0.0877873	0.00410516
BP	carbohydrate biosynthetic process	5	0.0901769	0.00428178
BP	organophosphate catabolic process	5	0.0922723	0.00444766
BP	aromatic amino acid family catabolic process	2	0.0926922	0.00453458
BP	glutamine family amino acid metabolic process	3	0.101907	0.0050587
BP	uronic acid metabolic process	2	0.112424	0.00590426
BP	glucuronate metabolic process	2	0.112424	0.00590426
BP	glyceraldehyde-3-phosphate metabolic process	2	0.112424	0.00590426
BP	negative regulation of plasma membrane bounded cell projection assembly	2	0.112424	0.00590426
BP	NADH regeneration	2	0.115491	0.00639772
BP	negative regulation of embryonic development	2	0.115491	0.00639772
BP	canonical glycolysis	2	0.115491	0.00639772
BP	glucose catabolic process to pyruvate	2	0.115491	0.00639772
BP	organic anion transport	7	0.119452	0.00670308
BP	glycolytic process through fructose-6-phosphate	2	0.120049	0.00690931
BP	glycolytic process through glucose-6-phosphate	2	0.120049	0.00690931
BP	monocarboxylic acid transport	4	0.122432	0.00713452
BP	regulation of ruffle assembly	2	0.135376	0.0079862
BP	nucleotide catabolic process	4	0.138787	0.00828729
BP	dicarboxylic acid transport	3	0.139836	0.00853875
BP	aromatic amino acid family metabolic process	2	0.139836	0.00855114
BP	cellular carbohydrate metabolic process	5	0.140153	0.00867135
BP	kidney development	5	0.141803	0.00894343
BP	bile acid and bile salt transport	2	0.141803	0.00913349
BP	pyridine nucleotide metabolic process	4	0.141803	0.00918152
BP	nicotinamide nucleotide metabolic process	4	0.141803	0.00918152
BP	response to antineoplastic agent	3	0.146994	0.00965321
BP	glucose catabolic process	2	0.146994	0.00973309
BP	coenzyme metabolic process	6	0.146994	0.00992162
BP	cellular response to xenobiotic stimulus	4	0.146994	0.00994063
BP	pyridine-containing compound metabolic process	4	0.148314	0.0101366
BP	regulation of blood pressure	4	0.149643	0.010335
BP	carbohydrate catabolic process	4	0.15421	0.0109454
BP	glutamate metabolic process	2	0.15421	0.0109833
BP	cellular response to dexamethasone stimulus	2	0.15421	0.0109833
BP	renal system development	5	0.157572	0.0113361
BP	response to cAMP	3	0.157953	0.0114772
BP	glycolytic process	3	0.16525	0.0121263
BP	ATP generation from ADP	3	0.16813	0.0124586
BP	oxidoreduction coenzyme metabolic process	4	0.169551	0.0126858
BP	response to interleukin-6	2	0.171879	0.0129836
BP	pyruvate biosynthetic process	3	0.176855	0.0134868
BP	negative regulation of cellular carbohydrate metabolic process	2	0.177752	0.0136831
BP	ADP metabolic process	3	0.181945	0.0141984
BP	regulation of glycoprotein biosynthetic process	2	0.181945	0.0143985
BP	ruffle assembly	2	0.181945	0.0143985
BP	inorganic anion transmembrane transport	3	0.182354	0.0145621
BP	response to tumor necrosis factor	5	0.189796	0.0152929
BP	negative regulation of carbohydrate metabolic process	2	0.1953	0.0158769
BP	nucleobase metabolic process	2	0.201347	0.0166395
BP	response to peptide hormone	6	0.201347	0.0166582
BP	regulation of glutamate receptor signaling pathway	2	0.208709	0.0174175
BP	acid secretion	3	0.213078	0.0180729
BP	response to dexamethasone	2	0.213078	0.0182107
BP	urogenital system development	5	0.213078	0.0182419
BP	nucleoside diphosphate phosphorylation	3	0.218482	0.0189115
BP	cofactor transport	2	0.218482	0.0190189
BP	embryonic cranial skeleton morphogenesis	2	0.220644	0.0198421
BP	icosanoid transport	2	0.220644	0.0198421
BP	fatty acid derivative transport	2	0.220644	0.0198421
BP	regulation of glycoprotein metabolic process	2	0.220644	0.0198421
BP	organic acid transmembrane transport	3	0.22119	0.0202094
BP	carboxylic acid transmembrane transport	3	0.22119	0.0202094
BP	purine nucleoside diphosphate metabolic process	3	0.222537	0.0206527
BP	purine ribonucleoside diphosphate metabolic process	3	0.222537	0.0206527
BP	ribonucleoside diphosphate metabolic process	3	0.226985	0.0215554
BP	nucleotide phosphorylation	3	0.226985	0.0215554
BP	embryonic skeletal system development	3	0.226985	0.0215554
BP	response to metal ion	5	0.230422	0.0220476
BP	antibiotic catabolic process	2	0.232351	0.0223993
BP	sodium ion transport	4	0.233374	0.0226658
BP	ruffle organization	2	0.23794	0.0232805
BP	glycoprotein biosynthetic process	5	0.24351	0.024131
BP	response to glucagon	2	0.24351	0.0241758
BP	cellular response to cAMP	2	0.25085	0.025085
BP	response to organophosphorus	3	0.251985	0.0253798
BP	monocarboxylic acid catabolic process	3	0.254586	0.0258819
BP	negative regulation of phosphoprotein phosphatase activity	2	0.254586	0.0260081
BP	nephron development	3	0.27676	0.0284725
BP	regulation of morphogenesis of a branching structure	2	0.278063	0.0288587
BP	neurotransmitter metabolic process	3	0.278063	0.0290065
BP	coenzyme biosynthetic process	4	0.280212	0.0294349
BP	response to zinc ion	2	0.280212	0.0298355
BP	negative regulation of protein dephosphorylation	2	0.280212	0.0298355
BP	ATP biosynthetic process	3	0.280712	0.0300907
BP	response to peptide	6	0.282935	0.0305325
BP	nucleoside diphosphate metabolic process	3	0.29233	0.0317567
BP	response to insulin	4	0.307353	0.0338475
BP	cellular response to glucocorticoid stimulus	2	0.307353	0.033872
BP	response to purine-containing compound	3	0.307353	0.034052
BP	lipid localization	5	0.308394	0.0343893
BP	glomerulus development	2	0.311081	0.0349127
BP	glycosyl compound metabolic process	3	0.31192	0.0352313
BP	purine ribonucleoside triphosphate biosynthetic process	3	0.320505	0.0364315
BP	purine nucleoside triphosphate biosynthetic process	3	0.323805	0.0370395
BP	lipid storage	2	0.329011	0.0381085
BP	cellular response to corticosteroid stimulus	2	0.329011	0.0381085
BP	organic hydroxy compound catabolic process	2	0.334263	0.0391978
BP	cranial skeletal system development	2	0.334263	0.0391978
BP	ATP metabolic process	4	0.335091	0.039536
BP	ribonucleoside triphosphate biosynthetic process	3	0.335422	0.0401575
BP	regulation of plasma membrane bounded cell projection assembly	3	0.335422	0.0401575
BP	secondary metabolic process	2	0.335422	0.0402989
BP	regulation of cell projection assembly	3	0.342875	0.041441
BP	pigment metabolic process	2	0.345213	0.0436716
BP	purine nucleoside monophosphate biosynthetic process	3	0.345213	0.0440696
BP	purine ribonucleoside monophosphate biosynthetic process	3	0.345213	0.0440696
BP	response to xenobiotic stimulus	4	0.345213	0.0442625
BP	negative regulation of cell projection organization	3	0.345213	0.0454146
BP	desmosome organization	1	0.345213	0.0471385
BP	histidine metabolic process	1	0.345213	0.0471385
BP	tyrosine metabolic process	1	0.345213	0.0471385
BP	lipid glycosylation	1	0.345213	0.0471385
BP	glomerular basement membrane development	1	0.345213	0.0471385
BP	tetrahydrofolate interconversion	1	0.345213	0.0471385
BP	long-chain fatty acid catabolic process	1	0.345213	0.0471385
BP	alditol phosphate metabolic process	1	0.345213	0.0471385
BP	prostatic bud formation	1	0.345213	0.0471385
BP	regulation of sequestering of zinc ion	1	0.345213	0.0471385
BP	proton-transporting V-type ATPase complex assembly	1	0.345213	0.0471385
BP	vacuolar proton-transporting V-type ATPase complex assembly	1	0.345213	0.0471385
BP	fat cell proliferation	1	0.345213	0.0471385
BP	regulation of fat cell proliferation	1	0.345213	0.0471385
BP	neurotransmitter-gated ion channel clustering	1	0.345213	0.0471385
BP	fatty acid derivative catabolic process	1	0.345213	0.0471385
BP	cellular response to interleukin-1	3	0.345213	0.0474702
BP	nucleoside triphosphate biosynthetic process	3	0.345213	0.0481655
BP	cellular response to tumor necrosis factor	4	0.345213	0.0482636
BP	response to estrogen	2	0.345213	0.0483257
BP	regulation of ATPase activity	2	0.345213	0.0495164
BP	carboxylic acid biosynthetic process	5	0.345213	0.0507669
BP	myeloid leukocyte migration	3	0.345213	0.0509967
BP	organic acid biosynthetic process	5	0.345213	0.0511942
BP	regulation of carbohydrate metabolic process	3	0.345213	0.051717
BP	androgen biosynthetic process	1	0.345213	0.0517298
BP	poly-N-acetyllactosamine metabolic process	1	0.345213	0.0517298
BP	negative regulation of protein autophosphorylation	1	0.345213	0.0517298
BP	phosphate ion transmembrane transport	1	0.345213	0.0517298
BP	amyloid precursor protein biosynthetic process	1	0.345213	0.0517298
BP	regulation of amyloid precursor protein biosynthetic process	1	0.345213	0.0517298
BP	aldehyde catabolic process	1	0.345213	0.0517298
BP	response to parathyroid hormone	1	0.345213	0.0517298
BP	cellular response to acidic pH	1	0.345213	0.0517298
BP	regulation of synapse maturation	1	0.345213	0.0517298
BP	ribonucleoside monophosphate biosynthetic process	3	0.345213	0.0531724
BP	regulation of carbohydrate biosynthetic process	2	0.345213	0.054384
BP	purine ribonucleoside triphosphate metabolic process	4	0.345213	0.0546304
BP	cofactor biosynthetic process	4	0.345213	0.055734
BP	adenosine receptor signaling pathway	1	0.345213	0.0562992
BP	oxaloacetate metabolic process	1	0.345213	0.0562992
BP	nucleoside triphosphate catabolic process	1	0.345213	0.0562992
BP	gastro-intestinal system smooth muscle contraction	1	0.345213	0.0562992
BP	C4-dicarboxylate transport	1	0.345213	0.0562992
BP	urate transport	1	0.345213	0.0562992
BP	sequestering of zinc ion	1	0.345213	0.0562992
BP	high-density lipoprotein particle clearance	1	0.345213	0.0562992
BP	imidazole-containing compound metabolic process	1	0.345213	0.0562992
BP	positive regulation of protein exit from endoplasmic reticulum	1	0.345213	0.0562992
BP	ATP hydrolysis coupled anion transmembrane transport	1	0.345213	0.0562992
BP	chemokine-mediated signaling pathway	2	0.345213	0.056879
BP	ribonucleoside triphosphate metabolic process	4	0.345213	0.0579773
BP	cellular amino acid biosynthetic process	2	0.345213	0.0581414
BP	purine nucleoside triphosphate metabolic process	4	0.345213	0.0585457
BP	hormone biosynthetic process	2	0.345213	0.0594134
BP	regulation of neurotransmitter levels	4	0.345213	0.0602688
BP	cellular carbohydrate biosynthetic process	2	0.345213	0.0606952
BP	nucleoside monophosphate biosynthetic process	3	0.345213	0.0607428
BP	neurological system process involved in regulation of systemic arterial blood pressure	1	0.345213	0.0608469
BP	glycine metabolic process	1	0.345213	0.0608469
BP	polyamine biosynthetic process	1	0.345213	0.0608469
BP	layer formation in cerebral cortex	1	0.345213	0.0608469
BP	negative regulation of gluconeogenesis	1	0.345213	0.0608469
BP	positive regulation of membrane potential	1	0.345213	0.0608469
BP	negative regulation of glucose import	1	0.345213	0.0608469
BP	chloride ion homeostasis	1	0.345213	0.0608469
BP	lateral sprouting from an epithelium	1	0.345213	0.0608469
BP	cellular response to epinephrine stimulus	1	0.345213	0.0608469
BP	regulation of brown fat cell differentiation	1	0.345213	0.0608469
BP	replicative senescence	1	0.345213	0.0608469
BP	negative regulation of substrate adhesion-dependent cell spreading	1	0.345213	0.0608469
BP	primary amino compound metabolic process	1	0.345213	0.0608469
BP	purine ribonucleoside monophosphate metabolic process	4	0.346512	0.0626082
BP	response to glucose	3	0.346512	0.0631076
BP	purine nucleoside monophosphate metabolic process	4	0.346512	0.0632005
BP	glutamate receptor signaling pathway	2	0.346512	0.063287
BP	response to interleukin-1	3	0.346512	0.0639054
BP	proteoglycan metabolic process	2	0.346512	0.0645968
BP	neutrophil chemotaxis	2	0.346512	0.0645968
BP	cellular response to ketone	2	0.346512	0.0645968
BP	negative regulation of ATPase activity	1	0.346512	0.065373
BP	response to potassium ion	1	0.346512	0.065373
BP	regulation of protein glycosylation	1	0.346512	0.065373
BP	proton-transporting two-sector ATPase complex assembly	1	0.346512	0.065373
BP	positive regulation of ruffle assembly	1	0.346512	0.065373
BP	chloride transmembrane transport	2	0.346512	0.0659159
BP	response to hexose	3	0.346512	0.0663268
BP	negative regulation of cell morphogenesis involved in differentiation	2	0.346512	0.0685809
BP	fatty acid transport	2	0.346512	0.0685809
BP	lipid catabolic process	4	0.346512	0.0686647
BP	G-protein coupled receptor internalization	1	0.346512	0.0698774
BP	sequestering of triglyceride	1	0.346512	0.0698774
BP	primary alcohol catabolic process	1	0.346512	0.0698774
BP	hepatocyte differentiation	1	0.346512	0.0698774
BP	monocyte chemotactic protein-1 production	1	0.346512	0.0698774
BP	regulation of monocyte chemotactic protein-1 production	1	0.346512	0.0698774
BP	postsynaptic density organization	1	0.346512	0.0698774
BP	postsynaptic specialization organization	1	0.346512	0.0698774
BP	negative regulation of TORC1 signaling	1	0.346512	0.0698774
BP	positive regulation of neuron migration	1	0.346512	0.0698774
BP	retinoid metabolic process	2	0.346512	0.0699266
BP	response to monosaccharide	3	0.346512	0.0704551
BP	nucleoside triphosphate metabolic process	4	0.346512	0.0705391
BP	ribonucleoside monophosphate metabolic process	4	0.346512	0.0705391
BP	alcohol metabolic process	4	0.346512	0.0711698
BP	water-soluble vitamin metabolic process	2	0.346512	0.0712811
BP	leukocyte chemotaxis	3	0.346512	0.0721385
BP	cellular response to insulin stimulus	3	0.346512	0.0721385
BP	protein processing	4	0.346512	0.0730793
BP	leukocyte migration	5	0.346512	0.0736756
BP	negative regulation of epithelial cell migration	2	0.346512	0.0740156
BP	regulation of TOR signaling	2	0.346512	0.0740156
BP	embryonic skeletal system morphogenesis	2	0.346512	0.0740156
BP	UDP-N-acetylglucosamine metabolic process	1	0.346512	0.0743605
BP	thyroid hormone generation	1	0.346512	0.0743605
BP	polyamine metabolic process	1	0.346512	0.0743605
BP	prostaglandin transport	1	0.346512	0.0743605
BP	positive regulation of CREB transcription factor activity	1	0.346512	0.0743605
BP	protein O-linked fucosylation	1	0.346512	0.0743605
BP	response to epinephrine	1	0.346512	0.0743605
BP	visual perception	3	0.346512	0.0755593
BP	regulation of glucose metabolic process	2	0.346512	0.0767836
BP	phenol-containing compound metabolic process	2	0.346512	0.0767836
BP	fat cell differentiation	3	0.346512	0.0781717
BP	neurotransmitter biosynthetic process	2	0.346512	0.0781798
BP	serine family amino acid biosynthetic process	1	0.346512	0.0788222
BP	negative regulation of glucose transmembrane transport	1	0.346512	0.0788222
BP	pseudopodium organization	1	0.346512	0.0788222
BP	response to vitamin A	1	0.346512	0.0788222
BP	progesterone metabolic process	1	0.346512	0.0788222
BP	short-chain fatty acid metabolic process	1	0.346512	0.0788222
BP	positive regulation of meiotic cell cycle	1	0.346512	0.0788222
BP	morphogenesis of an epithelial bud	1	0.346512	0.0788222
BP	detoxification of inorganic compound	1	0.346512	0.0788222
BP	negative regulation of kidney development	1	0.346512	0.0788222
BP	positive regulation of long-term synaptic potentiation	1	0.346512	0.0788222
BP	positive regulation of stem cell differentiation	1	0.346512	0.0788222
BP	cellular lipid catabolic process	3	0.346512	0.0790513
BP	sensory perception of light stimulus	3	0.346512	0.0790513
BP	diterpenoid metabolic process	2	0.346512	0.0795841
BP	neutrophil migration	2	0.346512	0.0795841
BP	nucleoside monophosphate metabolic process	4	0.346512	0.0803033
BP	cellular polysaccharide metabolic process	2	0.346512	0.0824163
BP	mature B cell differentiation involved in immune response	1	0.346512	0.0832626
BP	glycerol metabolic process	1	0.346512	0.0832626
BP	pyrimidine nucleobase metabolic process	1	0.346512	0.0832626
BP	glucocorticoid biosynthetic process	1	0.346512	0.0832626
BP	response to UV-B	1	0.346512	0.0832626
BP	response to magnesium ion	1	0.346512	0.0832626
BP	negative regulation of chemokine production	1	0.346512	0.0832626
BP	regulation of mammary gland epithelial cell proliferation	1	0.346512	0.0832626
BP	lipoprotein transport	1	0.346512	0.0832626
BP	myeloid dendritic cell differentiation	1	0.346512	0.0832626
BP	dicarboxylic acid catabolic process	1	0.346512	0.0832626
BP	lipoprotein localization	1	0.346512	0.0832626
BP	positive regulation of glycolytic process	1	0.346512	0.0832626
BP	negative regulation of receptor-mediated endocytosis	1	0.346512	0.0832626
BP	synapse maturation	1	0.346512	0.0832626
BP	positive regulation of dendritic spine morphogenesis	1	0.346512	0.0832626
BP	modified amino acid transport	1	0.346512	0.0832626
BP	regulation of NMDA receptor activity	1	0.346512	0.0832626
BP	negative regulation of phosphatase activity	2	0.353845	0.0852793
BP	desensitization of G-protein coupled receptor protein signaling pathway	1	0.356368	0.0876819
BP	positive regulation of glycoprotein biosynthetic process	1	0.356368	0.0876819
BP	negative adaptation of signaling pathway	1	0.356368	0.0876819
BP	negative regulation of fibroblast growth factor receptor signaling pathway	1	0.356368	0.0876819
BP	positive regulation of coenzyme metabolic process	1	0.356368	0.0876819
BP	sequestering of metal ion	1	0.356368	0.0876819
BP	amyloid-beta clearance	1	0.356368	0.0876819
BP	granulocyte chemotaxis	2	0.357316	0.0881723
BP	smooth muscle contraction	2	0.362167	0.0896298
BP	response to carbohydrate	3	0.362371	0.089941
BP	neuropeptide signaling pathway	2	0.363034	0.0910945
BP	glomerular filtration	1	0.363034	0.0920801
BP	arginine metabolic process	1	0.363034	0.0920801
BP	calcium-mediated signaling using intracellular calcium source	1	0.363034	0.0920801
BP	thyroid hormone metabolic process	1	0.363034	0.0920801
BP	negative regulation of stress fiber assembly	1	0.363034	0.0920801
BP	glucose transmembrane transport	2	0.363034	0.0925663
BP	chloride transport	2	0.363034	0.094045
BP	negative regulation of dephosphorylation	2	0.363034	0.094045
BP	organic hydroxy compound transport	3	0.363034	0.0946556
BP	phosphate ion transport	1	0.363034	0.0964574
BP	catechol-containing compound biosynthetic process	1	0.363034	0.0964574
BP	alditol metabolic process	1	0.363034	0.0964574
BP	cerebral cortex radial glia guided migration	1	0.363034	0.0964574
BP	telencephalon glial cell migration	1	0.363034	0.0964574
BP	adaptation of signaling pathway	1	0.363034	0.0964574
BP	positive regulation of nucleotide catabolic process	1	0.363034	0.0964574
BP	catecholamine biosynthetic process	1	0.363034	0.0964574
BP	tetrahydrofolate metabolic process	1	0.363034	0.0964574
BP	renal filtration	1	0.363034	0.0964574
BP	terpenoid metabolic process	2	0.363034	0.0970231
BP	regulation of phosphoprotein phosphatase activity	2	0.363034	0.0970231
BP	sulfur compound metabolic process	4	0.363034	0.097247
BP	transition metal ion transport	2	0.363034	0.0985223
BP	fatty acid catabolic process	2	0.363034	0.0985223
BP	TOR signaling	2	0.363034	0.0985223
BP	nucleotide biosynthetic process	4	0.363034	0.09873
BP	regulation of leukocyte chemotaxis	2	0.363034	0.100028
BP	polysaccharide metabolic process	2	0.363034	0.100028
BP	cellular ketone metabolic process	3	0.363034	0.100445
BP	mature B cell differentiation	1	0.363034	0.100814
BP	cobalamin metabolic process	1	0.363034	0.100814
BP	response to lithium ion	1	0.363034	0.100814
BP	response to acidic pH	1	0.363034	0.100814
BP	regulation of macrophage chemotaxis	1	0.363034	0.100814
BP	positive regulation of lipid storage	1	0.363034	0.100814
BP	intermediate filament organization	1	0.363034	0.100814
BP	pyrimidine nucleoside catabolic process	1	0.363034	0.100814
BP	positive regulation of cofactor metabolic process	1	0.363034	0.100814
BP	inclusion body assembly	1	0.363034	0.100814
BP	cellular response to pH	1	0.363034	0.100814
BP	hexose transmembrane transport	2	0.36314	0.10154
BP	nucleoside phosphate biosynthetic process	4	0.36314	0.101728
BP	positive regulation of ERK1 and ERK2 cascade	3	0.36314	0.102407
BP	renal system process	2	0.36314	0.103059
BP	cornification	2	0.36314	0.103059
BP	monosaccharide transmembrane transport	2	0.36314	0.104584
BP	cellular hormone metabolic process	2	0.36314	0.104584
BP	response to lead ion	1	0.36314	0.105149
BP	negative regulation of actin filament bundle assembly	1	0.36314	0.105149
BP	melanosome transport	1	0.36314	0.105149
BP	G-protein coupled purinergic receptor signaling pathway	1	0.36314	0.105149
BP	vitamin D metabolic process	1	0.36314	0.105149
BP	cellular biogenic amine biosynthetic process	1	0.36314	0.105149
BP	zinc ion transmembrane transport	1	0.36314	0.105149
BP	regulation of branching involved in ureteric bud morphogenesis	1	0.36314	0.105149
BP	positive regulation of glycoprotein metabolic process	1	0.36314	0.105149
BP	polyol metabolic process	2	0.36314	0.107652
BP	positive regulation of protein localization to membrane	2	0.36314	0.107652
BP	carbohydrate transmembrane transport	2	0.36314	0.109196
BP	granulocyte migration	2	0.36314	0.109196
BP	purine nucleobase metabolic process	1	0.36314	0.109464
BP	amine biosynthetic process	1	0.36314	0.109464
BP	regulation of cardiac muscle contraction by calcium ion signaling	1	0.36314	0.109464
BP	ovulation	1	0.36314	0.109464
BP	establishment of melanosome localization	1	0.36314	0.109464
BP	indole-containing compound metabolic process	1	0.36314	0.109464
BP	retinoic acid metabolic process	1	0.36314	0.109464
BP	eosinophil chemotaxis	1	0.36314	0.109464
BP	pigment granule transport	1	0.36314	0.109464
BP	regulation of protein exit from endoplasmic reticulum	1	0.36314	0.109464
BP	regulation of anion transmembrane transport	1	0.36314	0.109464
BP	regulation of macrophage migration	1	0.36314	0.109464
BP	regulation of AMPA receptor activity	1	0.36314	0.109464
BP	regulation of fat cell differentiation	2	0.366513	0.110745
BP	chondrocyte development	1	0.368062	0.113759
BP	glucocorticoid metabolic process	1	0.368062	0.113759
BP	spinal cord patterning	1	0.368062	0.113759
BP	purine ribonucleoside bisphosphate metabolic process	1	0.368062	0.113759
BP	3'-phosphoadenosine 5'-phosphosulfate metabolic process	1	0.368062	0.113759
BP	establishment of pigment granule localization	1	0.368062	0.113759
BP	innervation	1	0.368062	0.113759
BP	positive regulation of excitatory postsynaptic potential	1	0.368062	0.113759
BP	xenobiotic metabolic process	2	0.368062	0.113861
BP	regulation of cellular carbohydrate metabolic process	2	0.368062	0.113861
BP	regulation of generation of precursor metabolites and energy	2	0.370352	0.115427
BP	regulation of epithelial cell migration	3	0.370352	0.116556
BP	protein maturation	4	0.370352	0.117339
BP	regulation of glycogen biosynthetic process	1	0.370352	0.118033
BP	zinc ion transport	1	0.370352	0.118033
BP	regulation of glucan biosynthetic process	1	0.370352	0.118033
BP	melanosome localization	1	0.370352	0.118033
BP	melanosome organization	1	0.370352	0.118033
BP	morphogenesis of an epithelial fold	1	0.370352	0.118033
BP	cell differentiation involved in embryonic placenta development	1	0.370352	0.118033
BP	prostate gland epithelium morphogenesis	1	0.370352	0.118033
BP	regulation of mesonephros development	1	0.370352	0.118033
BP	positive regulation of ATP biosynthetic process	1	0.370352	0.118033
BP	regulation of embryonic development	2	0.371221	0.118577
BP	regulation of actin filament organization	3	0.373579	0.120728
BP	cellular amine metabolic process	2	0.373579	0.121748
BP	negative regulation of supramolecular fiber organization	2	0.373579	0.121748
BP	myeloid dendritic cell activation	1	0.373579	0.122287
BP	adult walking behavior	1	0.373579	0.122287
BP	positive regulation of vascular endothelial growth factor production	1	0.373579	0.122287
BP	carbohydrate phosphorylation	1	0.373579	0.122287
BP	pigment granule organization	1	0.373579	0.122287
BP	pigment granule localization	1	0.373579	0.122287
BP	positive regulation of protein targeting to membrane	1	0.373579	0.122287
BP	response to thyroid hormone	1	0.373579	0.122287
BP	regulation of protein dephosphorylation	2	0.375847	0.124941
BP	negative regulation of inflammatory response	2	0.375847	0.124941
BP	androgen metabolic process	1	0.375847	0.12652
BP	cerebral cortex radially oriented cell migration	1	0.375847	0.12652
BP	mammary gland epithelial cell proliferation	1	0.375847	0.12652
BP	fucosylation	1	0.375847	0.12652
BP	response to pain	1	0.375847	0.12652
BP	arachidonic acid secretion	1	0.375847	0.12652
BP	prostate gland morphogenesis	1	0.375847	0.12652
BP	eosinophil migration	1	0.375847	0.12652
BP	walking behavior	1	0.375847	0.12652
BP	arachidonate transport	1	0.375847	0.12652
BP	isoprenoid metabolic process	2	0.375847	0.126544
BP	regulation of inflammatory response	4	0.381903	0.128858
BP	glutamine family amino acid catabolic process	1	0.384998	0.130733
BP	positive regulation of synaptic transmission, glutamatergic	1	0.384998	0.130733
BP	regulation of TORC1 signaling	1	0.384998	0.130733
BP	protein glycosylation	3	0.389911	0.13357
BP	macromolecule glycosylation	3	0.389911	0.13357
BP	epithelial cell morphogenesis	1	0.389911	0.134926
BP	response to ATP	1	0.389911	0.134926
BP	positive regulation of G-protein coupled receptor protein signaling pathway	1	0.389911	0.134926
BP	response to arsenic-containing substance	1	0.389911	0.134926
BP	regulation of glycogen metabolic process	1	0.389911	0.134926
BP	positive regulation of neutrophil chemotaxis	1	0.389911	0.134926
BP	quinone metabolic process	1	0.389911	0.134926
BP	amine metabolic process	2	0.391349	0.136268
BP	positive regulation of ion transmembrane transport	2	0.391349	0.136268
BP	negative regulation of cytoskeleton organization	2	0.391349	0.136268
BP	cell chemotaxis	3	0.393784	0.139058
BP	leukotriene metabolic process	1	0.393784	0.139099
BP	folic acid-containing compound metabolic process	1	0.393784	0.139099
BP	nucleoside catabolic process	1	0.393784	0.139099
BP	heparan sulfate proteoglycan metabolic process	1	0.393784	0.139099
BP	purinergic receptor signaling pathway	1	0.393784	0.139099
BP	negative regulation of insulin receptor signaling pathway	1	0.393784	0.139099
BP	vitamin metabolic process	2	0.393974	0.141192
BP	negative regulation of cell migration	3	0.393974	0.141275
BP	neuron recognition	1	0.393974	0.143252
BP	regulation of vascular endothelial growth factor production	1	0.393974	0.143252
BP	cellular response to interleukin-6	1	0.393974	0.143252
BP	positive regulation of granulocyte chemotaxis	1	0.393974	0.143252
BP	positive regulation of ATP metabolic process	1	0.393974	0.143252
BP	positive regulation of signaling receptor activity	1	0.393974	0.143252
BP	glycosylation	3	0.393974	0.143503
BP	cellular response to starvation	2	0.393974	0.144495
BP	sex differentiation	3	0.393974	0.144622
BP	regulation of reproductive process	2	0.393974	0.146154
BP	regulation of cell morphogenesis involved in differentiation	3	0.393974	0.146868
BP	regulation of animal organ formation	1	0.393974	0.147386
BP	regulation of lamellipodium assembly	1	0.393974	0.147386
BP	positive regulation of BMP signaling pathway	1	0.393974	0.147386
BP	regulation of polysaccharide biosynthetic process	1	0.393974	0.147386
BP	regulation of fibroblast growth factor receptor signaling pathway	1	0.393974	0.147386
BP	peptide catabolic process	1	0.393974	0.147386
BP	acylglycerol homeostasis	1	0.393974	0.147386
BP	triglyceride homeostasis	1	0.393974	0.147386
BP	cellular response to alkaloid	1	0.393974	0.147386
BP	interleukin-6 secretion	1	0.393974	0.147386
BP	negative regulation of cell migration involved in sprouting angiogenesis	1	0.393974	0.147386
BP	regulation of protein targeting to membrane	1	0.393974	0.147386
BP	receptor localization to synapse	1	0.393974	0.147386
BP	negative regulation of cellular response to insulin stimulus	1	0.393974	0.147386
BP	regulation of long-term synaptic potentiation	1	0.393974	0.147386
BP	positive regulation of neutrophil migration	1	0.393974	0.147386
BP	negative regulation of angiogenesis	2	0.394364	0.147816
BP	response to glucocorticoid	2	0.398045	0.149482
BP	regulation of gluconeogenesis	1	0.39808	0.1515
BP	long-term memory	1	0.39808	0.1515
BP	vascular endothelial growth factor production	1	0.39808	0.1515
BP	macrophage chemotaxis	1	0.39808	0.1515
BP	positive regulation of dendrite morphogenesis	1	0.39808	0.1515
BP	cellular response to monoamine stimulus	1	0.39808	0.1515
BP	cellular response to catecholamine stimulus	1	0.39808	0.1515
BP	negative regulation of blood vessel morphogenesis	2	0.400805	0.152825
BP	reproductive structure development	4	0.401146	0.153243
BP	carbohydrate transport	2	0.402793	0.154502
BP	amyloid-beta metabolic process	1	0.402793	0.155594
BP	vitamin transport	1	0.402793	0.155594
BP	sulfur compound transport	1	0.402793	0.155594
BP	regulation of neutrophil chemotaxis	1	0.402793	0.155594
BP	reproductive system development	4	0.402793	0.155956
BP	sodium ion transmembrane transport	2	0.402793	0.157868
BP	negative regulation of cell motility	3	0.402793	0.15827
BP	postsynaptic membrane organization	1	0.402793	0.159668
BP	one-carbon metabolic process	1	0.402793	0.159668
BP	C21-steroid hormone metabolic process	1	0.402793	0.159668
BP	triglyceride biosynthetic process	1	0.402793	0.159668
BP	positive regulation of TOR signaling	1	0.402793	0.159668
BP	negative regulation of interleukin-6 production	1	0.402793	0.159668
BP	protein localization to synapse	1	0.402793	0.159668
BP	TORC1 signaling	1	0.402793	0.159668
BP	response to growth hormone	1	0.402793	0.159668
BP	pyrimidine-containing compound catabolic process	1	0.402793	0.159668
BP	autophagosome maturation	1	0.402793	0.159668
BP	regulation of neuron migration	1	0.402793	0.159668
BP	purine ribonucleotide biosynthetic process	3	0.404367	0.160583
BP	nucleotide-sugar metabolic process	1	0.406955	0.163723
BP	regulation of polysaccharide metabolic process	1	0.406955	0.163723
BP	pteridine-containing compound metabolic process	1	0.406955	0.163723
BP	sodium-independent organic anion transport	1	0.406955	0.163723
BP	regulation of dendritic spine morphogenesis	1	0.406955	0.163723
BP	response to monoamine	1	0.406955	0.163723
BP	response to catecholamine	1	0.406955	0.163723
BP	regulation of ion transmembrane transport	4	0.406955	0.164202
BP	negative regulation of vasculature development	2	0.406955	0.164641
BP	purine nucleotide biosynthetic process	3	0.406955	0.165241
BP	sterol metabolic process	2	0.406955	0.166342
BP	regulation of receptor internalization	1	0.406955	0.167759
BP	cellular zinc ion homeostasis	1	0.406955	0.167759
BP	neutral lipid biosynthetic process	1	0.406955	0.167759
BP	acylglycerol biosynthetic process	1	0.406955	0.167759
BP	calcium ion-regulated exocytosis of neurotransmitter	1	0.406955	0.167759
BP	brown fat cell differentiation	1	0.406955	0.167759
BP	tricarboxylic acid metabolic process	1	0.406955	0.167759
BP	modulation of excitatory postsynaptic potential	1	0.406955	0.167759
BP	regulation of neutrophil migration	1	0.406955	0.167759
BP	macrophage migration	1	0.406955	0.167759
BP	monocarboxylic acid biosynthetic process	3	0.408671	0.16876
BP	amino sugar metabolic process	1	0.411669	0.171776
BP	muscle filament sliding	1	0.411669	0.171776
BP	negative regulation of actin filament depolymerization	1	0.411669	0.171776
BP	actin-myosin filament sliding	1	0.411669	0.171776
BP	cellular response to glucagon stimulus	1	0.411669	0.171776
BP	glycosyl compound catabolic process	1	0.411669	0.171776
BP	phosphatidylinositol-mediated signaling	2	0.412928	0.174894
BP	skeletal muscle contraction	1	0.412928	0.175773
BP	serine family amino acid metabolic process	1	0.412928	0.175773
BP	neutral amino acid transport	1	0.412928	0.175773
BP	nucleoside bisphosphate metabolic process	1	0.412928	0.175773
BP	ribonucleoside bisphosphate metabolic process	1	0.412928	0.175773
BP	purine nucleoside bisphosphate metabolic process	1	0.412928	0.175773
BP	neuron maturation	1	0.412928	0.175773
BP	phenol-containing compound biosynthetic process	1	0.412928	0.175773
BP	zinc ion homeostasis	1	0.412928	0.175773
BP	dendritic cell differentiation	1	0.412928	0.175773
BP	ribonucleotide biosynthetic process	3	0.412928	0.175866
BP	epithelial cell migration	3	0.415027	0.177058
BP	regulation of ERK1 and ERK2 cascade	3	0.416422	0.178253
BP	response to corticosteroid	2	0.416422	0.178336
BP	purine-containing compound biosynthetic process	3	0.416422	0.17945
BP	phosphatidic acid biosynthetic process	1	0.416422	0.179751
BP	response to pH	1	0.416422	0.179751
BP	negative regulation of Notch signaling pathway	1	0.416422	0.179751
BP	positive regulation of dendritic spine development	1	0.416422	0.179751
BP	inositol lipid-mediated signaling	2	0.416422	0.18006
BP	ribose phosphate biosynthetic process	3	0.416422	0.180649
BP	epithelium migration	3	0.416422	0.180649
BP	regulation of protein localization to membrane	2	0.416571	0.183517
BP	organic cation transport	1	0.416571	0.183711
BP	cerebral cortex cell migration	1	0.416571	0.183711
BP	regulation of protein autophosphorylation	1	0.416571	0.183711
BP	icosanoid secretion	1	0.416571	0.183711
BP	protein exit from endoplasmic reticulum	1	0.416571	0.183711
BP	positive regulation of nitric oxide biosynthetic process	1	0.416571	0.183711
BP	phosphatidic acid metabolic process	1	0.416571	0.183711
BP	positive regulation of anion transport	1	0.416571	0.183711
BP	positive regulation of nitric oxide metabolic process	1	0.416571	0.183711
BP	response to nutrient levels	4	0.418819	0.185004
BP	regulation of lipid storage	1	0.422604	0.187651
BP	intermediate filament cytoskeleton organization	1	0.422604	0.187651
BP	regulation of meiotic cell cycle	1	0.422604	0.187651
BP	tissue migration	3	0.422604	0.187892
BP	maintenance of location	3	0.423964	0.189106
BP	cellular response to peptide hormone stimulus	3	0.423964	0.189106
BP	fat-soluble vitamin metabolic process	1	0.425378	0.191573
BP	ventral spinal cord development	1	0.425378	0.191573
BP	cellular response to amino acid starvation	1	0.425378	0.191573
BP	regulation of endocrine process	1	0.425378	0.191573
BP	intermediate filament-based process	1	0.425378	0.191573
BP	beta-catenin-TCF complex assembly	1	0.425378	0.191573
BP	negative regulation of cellular component movement	3	0.427219	0.192762
BP	calcium-mediated signaling	2	0.427219	0.193946
BP	positive regulation of cell migration	4	0.427219	0.194738
BP	glial cell migration	1	0.427219	0.195476
BP	protein N-linked glycosylation via asparagine	1	0.427219	0.195476
BP	negative regulation of TOR signaling	1	0.427219	0.195476
BP	developmental pigmentation	1	0.427219	0.195476
BP	protein K63-linked ubiquitination	1	0.427219	0.195476
BP	negative regulation of mRNA catabolic process	1	0.427219	0.195476
BP	regulation of lamellipodium organization	1	0.427219	0.195476
BP	ERK1 and ERK2 cascade	3	0.430966	0.198895
BP	regulation of phosphatase activity	2	0.430966	0.19919
BP	purine nucleotide catabolic process	1	0.430966	0.19936
BP	peptidyl-asparagine modification	1	0.430966	0.19936
BP	negative regulation of G-protein coupled receptor protein signaling pathway	1	0.430966	0.19936
BP	positive regulation of protein tyrosine kinase activity	1	0.430966	0.19936
BP	regulation of neurotransmitter receptor activity	1	0.430966	0.19936
BP	protein homooligomerization	3	0.431953	0.200128
BP	response to BMP	2	0.432366	0.200942
BP	cellular response to BMP stimulus	2	0.432366	0.200942
BP	response to heat	2	0.432595	0.202695
BP	cellular response to lipopolysaccharide	2	0.432595	0.202695
BP	nucleobase-containing small molecule catabolic process	1	0.432595	0.203226
BP	sarcomere organization	1	0.432595	0.203226
BP	negative regulation of fat cell differentiation	1	0.432595	0.203226
BP	endocrine hormone secretion	1	0.432595	0.203226
BP	regulation of granulocyte chemotaxis	1	0.432595	0.203226
BP	regulation of leukocyte migration	2	0.434536	0.204451
BP	glycogen biosynthetic process	1	0.434792	0.207074
BP	pyrimidine nucleoside metabolic process	1	0.434792	0.207074
BP	glucan biosynthetic process	1	0.434792	0.207074
BP	amyloid precursor protein metabolic process	1	0.434792	0.207074
BP	positive regulation of Notch signaling pathway	1	0.434792	0.207074
BP	alcohol catabolic process	1	0.434792	0.207074
BP	ventricular cardiac muscle tissue morphogenesis	1	0.434792	0.207074
BP	retina morphogenesis in camera-type eye	1	0.434792	0.207074
BP	response to lipopolysaccharide	3	0.435144	0.207561
BP	generation of precursor metabolites and energy	4	0.435144	0.208632
BP	response to acid chemical	3	0.435144	0.208807
BP	regulation of actin cytoskeleton organization	3	0.435144	0.208807
BP	negative regulation of locomotion	3	0.435144	0.208807
BP	response to starvation	2	0.435594	0.209728
BP	positive regulation of cell motility	4	0.435594	0.21064
BP	regulation of actin filament depolymerization	1	0.435594	0.210903
BP	prostate gland development	1	0.435594	0.210903
BP	negative regulation of endocytosis	1	0.435594	0.210903
BP	regulation of substrate adhesion-dependent cell spreading	1	0.435594	0.210903
BP	receptor-mediated endocytosis	3	0.435772	0.211302
BP	regulation of supramolecular fiber organization	3	0.437594	0.212553
BP	response to extracellular stimulus	4	0.437594	0.214674
BP	receptor clustering	1	0.437594	0.214713
BP	multicellular organismal movement	1	0.437594	0.214713
BP	musculoskeletal movement	1	0.437594	0.214713
BP	positive regulation of reactive oxygen species biosynthetic process	1	0.437594	0.214713
BP	Notch signaling pathway	2	0.437594	0.215019
BP	regulation of actin polymerization or depolymerization	2	0.437594	0.215019
BP	regulation of morphogenesis of an epithelium	2	0.437594	0.215019
BP	regulation of actin filament length	2	0.439902	0.216786
BP	cellular response to molecule of bacterial origin	2	0.439902	0.216786
BP	regulation of angiogenesis	3	0.440178	0.21757
BP	dendritic spine morphogenesis	1	0.440178	0.218506
BP	protein trimerization	1	0.440178	0.218506
BP	protein K48-linked ubiquitination	1	0.440178	0.218506
BP	negative regulation of RNA catabolic process	1	0.440178	0.218506
BP	negative regulation of defense response	2	0.442557	0.220324
BP	response to ketone	2	0.442557	0.220324
BP	positive regulation of transmembrane transport	2	0.443285	0.222094
BP	actin filament depolymerization	1	0.443285	0.22228
BP	cellular pigmentation	1	0.443285	0.22228
BP	cellular response to vascular endothelial growth factor stimulus	1	0.443285	0.22228
BP	regulation of insulin receptor signaling pathway	1	0.443285	0.22228
BP	actomyosin structure organization	2	0.443924	0.223866
BP	morphogenesis of a branching epithelium	2	0.443924	0.223866
BP	carbohydrate derivative catabolic process	2	0.443924	0.223866
BP	regulation of epithelial cell proliferation	3	0.443924	0.223878
BP	lipid transport	3	0.44503	0.225144
BP	catecholamine metabolic process	1	0.44503	0.226037
BP	catechol-containing compound metabolic process	1	0.44503	0.226037
BP	positive regulation of ATPase activity	1	0.44503	0.226037
BP	purine-containing compound catabolic process	1	0.44503	0.226037
BP	cellular modified amino acid metabolic process	2	0.445846	0.227413
BP	regulation of cell-substrate adhesion	2	0.445846	0.227413
BP	response to interferon-gamma	2	0.445846	0.227413
BP	ventricular cardiac muscle tissue development	1	0.447322	0.229775
BP	cellular biogenic amine metabolic process	1	0.447322	0.229775
BP	telencephalon cell migration	1	0.447322	0.229775
BP	pigment biosynthetic process	1	0.447322	0.229775
BP	regulation of kidney development	1	0.447322	0.229775
BP	response to molecule of bacterial origin	3	0.447567	0.230223
BP	ovarian follicle development	1	0.452663	0.233496
BP	negative regulation of reproductive process	1	0.452663	0.233496
BP	negative regulation of cell-substrate adhesion	1	0.457291	0.237199
BP	regulation of nitric oxide biosynthetic process	1	0.457291	0.237199
BP	positive regulation of small GTPase mediated signal transduction	1	0.457291	0.237199
BP	negative regulation of sprouting angiogenesis	1	0.457291	0.237199
BP	cellular response to peptide	3	0.45993	0.240445
BP	negative regulation of endothelial cell proliferation	1	0.45993	0.240884
BP	forebrain cell migration	1	0.45993	0.240884
BP	plasma lipoprotein particle clearance	1	0.45993	0.240884
BP	positive regulation of fat cell differentiation	1	0.45993	0.240884
BP	positive regulation of reproductive process	1	0.45993	0.240884
BP	positive regulation of cation channel activity	1	0.45993	0.240884
BP	response to activity	1	0.463116	0.244552
BP	tetrapyrrole metabolic process	1	0.463116	0.244552
BP	polyol biosynthetic process	1	0.463116	0.244552
BP	lymphocyte chemotaxis	1	0.463116	0.244552
BP	negative regulation of cytokine secretion	1	0.463116	0.244552
BP	regulation of postsynapse organization	1	0.463116	0.244552
BP	morphogenesis of a branching structure	2	0.464776	0.246989
BP	ammonium ion metabolic process	2	0.464776	0.246989
BP	branching involved in ureteric bud morphogenesis	1	0.464776	0.248202
BP	primary alcohol metabolic process	1	0.464776	0.248202
BP	animal organ formation	1	0.464776	0.248202
BP	positive chemotaxis	1	0.464776	0.248202
BP	antimicrobial humoral immune response mediated by antimicrobial peptide	1	0.464776	0.248202
BP	cellular response to ammonium ion	1	0.464776	0.248202
BP	regulation of dephosphorylation	2	0.464776	0.248772
BP	regulation of chemotaxis	2	0.464776	0.248772
BP	monocyte chemotaxis	1	0.467734	0.251835
BP	neural retina development	1	0.467734	0.251835
BP	proteoglycan biosynthetic process	1	0.467734	0.251835
BP	negative regulation of blood vessel endothelial cell migration	1	0.467734	0.251835
BP	regulation of vasculature development	3	0.467734	0.252038
BP	actin polymerization or depolymerization	2	0.470981	0.254126
BP	cellular response to biotic stimulus	2	0.473658	0.255912
BP	long-chain fatty acid transport	1	0.476923	0.259048
BP	lamellipodium assembly	1	0.476923	0.259048
BP	negative regulation of axonogenesis	1	0.476923	0.259048
BP	negative regulation of protein depolymerization	1	0.476923	0.259048
BP	response to nutrient	2	0.480376	0.261269
BP	regulation of smooth muscle contraction	1	0.480967	0.262629
BP	response to cadmium ion	1	0.480967	0.262629
BP	alpha-amino acid biosynthetic process	1	0.480967	0.262629
BP	fatty acid metabolic process	3	0.48232	0.263715
BP	cellular response to nutrient levels	2	0.48343	0.264842
BP	regulation of actin filament-based process	3	0.48343	0.265017
BP	regulation of glucose import	1	0.483671	0.266193
BP	ureteric bud morphogenesis	1	0.483671	0.266193
BP	regulation of cell migration involved in sprouting angiogenesis	1	0.483671	0.266193
BP	skeletal system morphogenesis	2	0.48383	0.266629
BP	mesonephric tubule morphogenesis	1	0.488837	0.26974
BP	somitogenesis	1	0.492665	0.273269
BP	B cell activation involved in immune response	1	0.492665	0.273269
BP	L-amino acid transport	1	0.492665	0.273269
BP	regulation of behavior	1	0.492665	0.273269
BP	regulation of glycolytic process	1	0.49629	0.276782
BP	nitric oxide biosynthetic process	1	0.49629	0.276782
BP	regulation of bone mineralization	1	0.49629	0.276782
BP	cardiac muscle tissue morphogenesis	1	0.49629	0.276782
BP	gonad development	2	0.49629	0.277347
BP	glycolipid biosynthetic process	1	0.49629	0.280279
BP	positive regulation of phosphatidylinositol 3-kinase signaling	1	0.49629	0.280279
BP	myofibril assembly	1	0.49629	0.280279
BP	positive regulation of nucleotide biosynthetic process	1	0.49629	0.280279
BP	multicellular organismal response to stress	1	0.49629	0.280279
BP	cellular polysaccharide biosynthetic process	1	0.49629	0.280279
BP	positive regulation of carbohydrate metabolic process	1	0.49629	0.280279
BP	regulation of dendritic spine development	1	0.49629	0.280279
BP	positive regulation of purine nucleotide biosynthetic process	1	0.49629	0.280279
BP	actin filament organization	3	0.498725	0.282013
BP	negative regulation of protein complex disassembly	1	0.499271	0.283758
BP	regulation of synaptic transmission, glutamatergic	1	0.499271	0.283758
BP	cellular response to retinoic acid	1	0.499271	0.283758
BP	positive regulation of dendrite development	1	0.499271	0.283758
BP	mammary gland epithelium development	1	0.503452	0.287221
BP	dendritic spine organization	1	0.503452	0.287221
BP	regulation of cellular response to insulin stimulus	1	0.503452	0.287221
BP	development of primary sexual characteristics	2	0.504285	0.288059
BP	associative learning	1	0.506936	0.290667
BP	regulation of nucleotide catabolic process	1	0.506936	0.290667
BP	nitric oxide metabolic process	1	0.506936	0.290667
BP	epithelial cell proliferation	3	0.507245	0.29121
BP	regulation of chemokine production	1	0.511634	0.294097
BP	keratinization	2	0.512897	0.295193
BP	cardiac ventricle morphogenesis	1	0.513714	0.297511
BP	long-term synaptic potentiation	1	0.513714	0.297511
BP	nephron tubule morphogenesis	1	0.513714	0.297511
BP	neuron projection organization	1	0.513714	0.297511
BP	regulation of cardiac conduction	1	0.513714	0.297511
BP	hippocampus development	1	0.517097	0.300908
BP	Rab protein signal transduction	1	0.517097	0.300908
BP	reactive nitrogen species metabolic process	1	0.517097	0.300908
BP	cell migration involved in sprouting angiogenesis	1	0.517097	0.304289
BP	T cell costimulation	1	0.517097	0.304289
BP	regulation of carbohydrate catabolic process	1	0.517097	0.304289
BP	regulation of cardiac muscle contraction	1	0.517097	0.304289
BP	nephron epithelium morphogenesis	1	0.517097	0.304289
BP	negative regulation of mRNA metabolic process	1	0.517097	0.304289
BP	positive regulation of lipid localization	1	0.517097	0.304289
BP	regulation of ATP biosynthetic process	1	0.517097	0.304289
BP	ameboidal-type cell migration	3	0.517097	0.305707
BP	polysaccharide biosynthetic process	1	0.517097	0.307654
BP	glycogen metabolic process	1	0.517097	0.307654
BP	negative regulation of endothelial cell migration	1	0.517097	0.307654
BP	regulation of glucose transmembrane transport	1	0.517097	0.307654
BP	regulation of calcium ion-dependent exocytosis	1	0.517097	0.307654
BP	lymphocyte costimulation	1	0.517097	0.307654
BP	cellular response to UV	1	0.517097	0.307654
BP	regulation of stress fiber assembly	1	0.517097	0.307654
BP	regulation of biomineral tissue development	1	0.517097	0.307654
BP	vasculogenesis	1	0.517097	0.311002
BP	cellular glucan metabolic process	1	0.517097	0.311002
BP	nerve development	1	0.517097	0.311002
BP	glucan metabolic process	1	0.517097	0.311002
BP	glucose import	1	0.517097	0.311002
BP	regulation of calcium-mediated signaling	1	0.517097	0.311002
BP	regulation of protein tyrosine kinase activity	1	0.517097	0.311002
BP	renal tubule morphogenesis	1	0.517097	0.311002
BP	mononuclear cell migration	1	0.517097	0.311002
BP	nephron morphogenesis	1	0.517097	0.311002
BP	response to temperature stimulus	2	0.519765	0.312981
BP	adult locomotory behavior	1	0.52015	0.314335
BP	regulation of receptor-mediated endocytosis	1	0.52015	0.314335
BP	regulation of reactive oxygen species biosynthetic process	1	0.52015	0.314335
BP	regulation of heart contraction	2	0.520226	0.314755
BP	cellular response to extracellular stimulus	2	0.521294	0.316529
BP	oligosaccharide metabolic process	1	0.521294	0.317652
BP	chemokine production	1	0.521294	0.317652
BP	protein homotetramerization	1	0.521294	0.317652
BP	muscle tissue morphogenesis	1	0.521294	0.317652
BP	regulation of protein depolymerization	1	0.521294	0.317652
BP	positive regulation of ion transport	2	0.521744	0.318301
BP	amino acid transmembrane transport	1	0.524852	0.320953
BP	lamellipodium organization	1	0.524852	0.320953
BP	organic hydroxy compound biosynthetic process	2	0.52569	0.321843
BP	pyrimidine-containing compound metabolic process	1	0.534314	0.327507
BP	regulation of anion transport	1	0.538359	0.330761
BP	regulation of dendrite morphogenesis	1	0.538359	0.330761
BP	axon guidance	2	0.544592	0.335966
BP	regulation of organ morphogenesis	2	0.544592	0.335966
BP	odontogenesis of dentin-containing tooth	1	0.544592	0.337222
BP	muscle organ morphogenesis	1	0.544592	0.337222
BP	somite development	1	0.544592	0.337222
BP	regulation of actomyosin structure organization	1	0.544592	0.337222
BP	negative regulation of cell adhesion	2	0.544592	0.337726
BP	establishment of vesicle localization	2	0.544592	0.337726
BP	neuron projection guidance	2	0.546492	0.339484
BP	embryonic organ development	3	0.546492	0.340077
BP	substrate adhesion-dependent cell spreading	1	0.546492	0.34043
BP	gland development	3	0.546492	0.341399
BP	positive regulation of leukocyte chemotaxis	1	0.546492	0.343622
BP	contractile actin filament bundle assembly	1	0.546492	0.343622
BP	positive regulation of protein binding	1	0.546492	0.343622
BP	positive regulation of ion transmembrane transporter activity	1	0.546492	0.343622
BP	stress fiber assembly	1	0.546492	0.343622
BP	positive regulation of nucleotide metabolic process	1	0.546492	0.343622
BP	ephrin receptor signaling pathway	1	0.546492	0.343622
BP	positive regulation of purine nucleotide metabolic process	1	0.546492	0.343622
BP	synaptic vesicle exocytosis	1	0.548407	0.346798
BP	regulation of BMP signaling pathway	1	0.548407	0.346798
BP	regulation of actin filament bundle assembly	1	0.548407	0.346798
BP	regulation of coenzyme metabolic process	1	0.548407	0.346798
BP	regulation of plasma lipoprotein particle levels	1	0.548407	0.346798
BP	embryonic placenta development	1	0.550347	0.34996
BP	regulation of striated muscle contraction	1	0.550347	0.34996
BP	response to vitamin	1	0.550347	0.34996
BP	positive regulation of reactive oxygen species metabolic process	1	0.550347	0.34996
BP	developmental maturation	2	0.550347	0.350005
BP	energy reserve metabolic process	1	0.553339	0.353106
BP	dendritic spine development	1	0.553339	0.353106
BP	regulation of ATP metabolic process	1	0.553339	0.353106
BP	cellular response to steroid hormone stimulus	2	0.553339	0.3535
BP	positive regulation of plasma membrane bounded cell projection assembly	1	0.556997	0.356238
BP	vesicle localization	2	0.558728	0.358731
BP	protein N-linked glycosylation	1	0.558728	0.359354
BP	kidney morphogenesis	1	0.558728	0.359354
BP	nephron tubule development	1	0.558728	0.359354
BP	lymphocyte migration	1	0.558728	0.359354
BP	negative regulation of hydrolase activity	3	0.558931	0.359887
BP	receptor internalization	1	0.562292	0.362456
BP	extracellular matrix disassembly	1	0.565188	0.365542
BP	segmentation	1	0.565188	0.365542
BP	renal tubule development	1	0.565188	0.365542
BP	energy derivation by oxidation of organic compounds	2	0.567413	0.367416
BP	sensory perception of pain	1	0.567413	0.368614
BP	synaptic transmission, glutamatergic	1	0.567413	0.368614
BP	vascular endothelial growth factor receptor signaling pathway	1	0.567413	0.368614
BP	negative regulation of transport	3	0.567547	0.36911
BP	heart contraction	2	0.567718	0.370878
BP	regulation of heart rate	1	0.567718	0.371672
BP	chondrocyte differentiation	1	0.567718	0.371672
BP	female gonad development	1	0.567718	0.371672
BP	regulation of Notch signaling pathway	1	0.567718	0.371672
BP	positive regulation of transporter activity	1	0.567718	0.371672
BP	cellular divalent inorganic cation homeostasis	3	0.57111	0.374371
BP	ureteric bud development	1	0.57111	0.374714
BP	heart process	2	0.571397	0.376057
BP	triglyceride metabolic process	1	0.571397	0.377742
BP	pigmentation	1	0.571397	0.377742
BP	mesonephric epithelium development	1	0.571397	0.377742
BP	mesonephric tubule development	1	0.571397	0.377742
BP	reactive oxygen species biosynthetic process	1	0.571397	0.377742
BP	glycerolipid biosynthetic process	2	0.571397	0.37778
BP	regulation of phosphatidylinositol 3-kinase signaling	1	0.578546	0.383755
BP	spinal cord development	1	0.578546	0.383755
BP	bone mineralization	1	0.578546	0.383755
BP	long-chain fatty acid metabolic process	1	0.580562	0.38674
BP	limbic system development	1	0.580562	0.38674
BP	development of primary female sexual characteristics	1	0.580562	0.38674
BP	mesonephros development	1	0.580562	0.38971
BP	acyl-CoA metabolic process	1	0.580562	0.38971
BP	respiratory electron transport chain	1	0.580562	0.38971
BP	unsaturated fatty acid metabolic process	1	0.580562	0.38971
BP	thioester metabolic process	1	0.580562	0.38971
BP	regulation of cofactor metabolic process	1	0.580562	0.38971
BP	positive regulation of transmembrane receptor protein serine/threonine kinase signaling pathway	1	0.580562	0.38971
BP	postsynapse organization	1	0.580562	0.38971
BP	regulation of cell morphogenesis	3	0.580562	0.390104
BP	protein depolymerization	1	0.58375	0.392666
BP	positive regulation of response to external stimulus	2	0.583912	0.393195
BP	regulation of blood circulation	2	0.585618	0.394898
BP	cell aging	1	0.585618	0.395608
BP	response to retinoic acid	1	0.585618	0.395608
BP	divalent inorganic cation homeostasis	3	0.588074	0.397938
BP	positive regulation of autophagy	1	0.588074	0.398536
BP	regulation of protein complex disassembly	1	0.588074	0.398536
BP	regulation of complement activation	1	0.591119	0.40145
BP	regulation of sprouting angiogenesis	1	0.591119	0.40145
BP	aging	2	0.592112	0.403379
BP	positive regulation of cell-substrate adhesion	1	0.592112	0.40435
BP	response to alkaloid	1	0.592112	0.40435
BP	actin-mediated cell contraction	1	0.592112	0.40435
BP	regulation of protein activation cascade	1	0.592112	0.40435
BP	embryonic organ morphogenesis	2	0.592112	0.405069
BP	cellular component assembly involved in morphogenesis	1	0.592112	0.407237
BP	antimicrobial humoral response	1	0.592112	0.407237
BP	cerebral cortex development	1	0.592112	0.407237
BP	regulation of interleukin-6 production	1	0.592112	0.407237
BP	camera-type eye morphogenesis	1	0.592112	0.407237
BP	excitatory postsynaptic potential	1	0.592112	0.407237
BP	icosanoid metabolic process	1	0.594423	0.410109
BP	response to amino acid	1	0.594423	0.410109
BP	nephron epithelium development	1	0.594423	0.410109
BP	regulation of small molecule metabolic process	3	0.595003	0.410937
BP	memory	1	0.59732	0.412968
BP	regulation of vesicle-mediated transport	3	0.60834	0.421279
BP	phospholipase C-activating G-protein coupled receptor signaling pathway	1	0.60834	0.421461
BP	skeletal system development	3	0.608596	0.422567
BP	negative regulation of cell development	2	0.608596	0.423506
BP	cell-cell junction assembly	1	0.608596	0.424266
BP	fibroblast growth factor receptor signaling pathway	1	0.608596	0.424266
BP	cellular transition metal ion homeostasis	1	0.608596	0.424266
BP	detoxification	1	0.608596	0.424266
BP	keratinocyte differentiation	2	0.610815	0.426828
BP	neutrophil activation	3	0.610815	0.428997
BP	axon development	3	0.610815	0.428997
BP	acylglycerol metabolic process	1	0.610815	0.429834
BP	calcium ion regulated exocytosis	1	0.610815	0.429834
BP	female sex differentiation	1	0.610815	0.429834
BP	positive regulation of cytokine secretion	1	0.610815	0.429834
BP	positive regulation of inflammatory response	1	0.610815	0.429834
BP	protein dephosphorylation	2	0.610815	0.43014
BP	negative regulation of response to external stimulus	2	0.610815	0.431792
BP	synapse organization	2	0.610815	0.431792
BP	neutral lipid metabolic process	1	0.610815	0.432598
BP	interleukin-6 production	1	0.610815	0.432598
BP	negative regulation of transmembrane transport	1	0.610815	0.432598
BP	negative regulation of protein secretion	1	0.610815	0.432598
BP	neutrophil mediated immunity	3	0.610815	0.432843
BP	localization within membrane	1	0.613727	0.435349
BP	cellular response to external stimulus	2	0.613955	0.436734
BP	protein O-linked glycosylation	1	0.613955	0.438087
BP	gland morphogenesis	1	0.613955	0.438087
BP	viral entry into host cell	1	0.613955	0.438087
BP	cellular response to abiotic stimulus	2	0.613955	0.440016
BP	cellular response to environmental stimulus	2	0.613955	0.440016
BP	cardiac ventricle development	1	0.613955	0.440811
BP	synaptic vesicle transport	1	0.613955	0.440811
BP	lipid homeostasis	1	0.613955	0.440811
BP	negative regulation of small molecule metabolic process	1	0.613955	0.440811
BP	cellular response to light stimulus	1	0.613955	0.440811
BP	establishment of synaptic vesicle localization	1	0.613955	0.440811
BP	steroid metabolic process	2	0.614512	0.441653
BP	B cell differentiation	1	0.615881	0.443523
BP	response to ammonium ion	1	0.615881	0.443523
BP	cellular response to glucose stimulus	1	0.617776	0.446221
BP	regulation of regulated secretory pathway	1	0.617776	0.446221
BP	positive regulation of cation transmembrane transport	1	0.617776	0.446221
BP	protein-containing complex disassembly	2	0.618415	0.448176
BP	positive regulation of leukocyte migration	1	0.618415	0.448907
BP	negative regulation of peptide secretion	1	0.618415	0.448907
BP	cardiac chamber morphogenesis	1	0.618415	0.448907
BP	odontogenesis	1	0.618415	0.448907
BP	cell-substrate adhesion	2	0.619029	0.4498
BP	regulation of humoral immune response	1	0.619029	0.45158
BP	insulin receptor signaling pathway	1	0.619029	0.45158
BP	cellular response to hexose stimulus	1	0.619029	0.45158
BP	chemical synaptic transmission, postsynaptic	1	0.619029	0.45158
BP	complement activation, classical pathway	1	0.620189	0.45424
BP	nucleoside metabolic process	1	0.620189	0.45424
BP	response to estradiol	1	0.620189	0.45424
BP	cellular response to monosaccharide stimulus	1	0.620189	0.45424
BP	hormone transport	2	0.620189	0.454657
BP	glycolipid metabolic process	1	0.621402	0.456887
BP	positive regulation of hormone secretion	1	0.621402	0.456887
BP	liposaccharide metabolic process	1	0.621402	0.456887
BP	female gamete generation	1	0.623156	0.459521
BP	synaptic vesicle localization	1	0.623156	0.459521
BP	regulation of protein targeting	1	0.623156	0.459521
BP	phosphatidylinositol 3-kinase signaling	1	0.6278	0.464752
BP	regulation of blood vessel endothelial cell migration	1	0.6278	0.464752
BP	cardiac muscle contraction	1	0.6278	0.464752
BP	regulation of postsynaptic membrane potential	1	0.6278	0.464752
BP	positive regulation of chemotaxis	1	0.630273	0.467349
BP	humoral immune response	2	0.630273	0.46749
BP	actin filament-based movement	1	0.632953	0.469933
BP	regulation of Rho protein signal transduction	1	0.635801	0.472505
BP	cellular response to drug	2	0.63678	0.473841
BP	biomineral tissue development	1	0.63678	0.475065
BP	cellular response to carbohydrate stimulus	1	0.63678	0.475065
BP	synaptic vesicle cycle	1	0.63678	0.475065
BP	dendrite morphogenesis	1	0.636837	0.477612
BP	regionalization	2	0.636837	0.478575
BP	cellular glucose homeostasis	1	0.636837	0.480148
BP	cholesterol metabolic process	1	0.636837	0.480148
BP	response to UV	1	0.636837	0.480148
BP	entry into host cell	1	0.636837	0.480148
BP	entry into host	1	0.636837	0.480148
BP	entry into cell of other organism involved in symbiotic interaction	1	0.636837	0.480148
BP	entry into other organism involved in symbiotic interaction	1	0.636837	0.480148
BP	regulation of lipid localization	1	0.636837	0.480148
BP	positive regulation of cellular catabolic process	2	0.636837	0.480148
BP	humoral immune response mediated by circulating immunoglobulin	1	0.638356	0.48267
BP	learning	1	0.638356	0.48267
BP	regulation of dendrite development	1	0.638356	0.48267
BP	regulation of small GTPase mediated signal transduction	2	0.638638	0.484847
BP	liver development	1	0.638638	0.485181
BP	amino acid transport	1	0.638638	0.485181
BP	mammary gland development	1	0.638638	0.485181
BP	retina development in camera-type eye	1	0.638638	0.485181
BP	regulation of Wnt signaling pathway	2	0.639277	0.486408
BP	negative regulation of neuron projection development	1	0.639277	0.48768
BP	response to hypoxia	2	0.639277	0.487966
BP	second-messenger-mediated signaling	2	0.639277	0.487966
BP	extracellular matrix organization	2	0.639277	0.487966
BP	regulation of G-protein coupled receptor protein signaling pathway	1	0.640952	0.490167
BP	vesicle-mediated transport in synapse	1	0.640952	0.490167
BP	alcohol biosynthetic process	1	0.641773	0.492642
BP	hepaticobiliary system development	1	0.641773	0.492642
BP	kidney epithelium development	1	0.641773	0.492642
BP	proton transmembrane transport	1	0.641773	0.492642
BP	adult behavior	1	0.641974	0.495105
BP	transition metal ion homeostasis	1	0.641974	0.495105
BP	cardiac conduction	1	0.641974	0.495105
BP	secondary alcohol metabolic process	1	0.641974	0.495105
BP	regulation of stem cell differentiation	1	0.641974	0.495105
BP	positive regulation of cellular protein localization	2	0.642754	0.497254
BP	positive regulation of cell morphogenesis involved in differentiation	1	0.642754	0.497556
BP	cellular response to fibroblast growth factor stimulus	1	0.642754	0.497556
BP	actin filament bundle assembly	1	0.642754	0.497556
BP	neuron migration	1	0.643938	0.499996
BP	negative regulation of epithelial cell proliferation	1	0.643938	0.499996
BP	muscle contraction	2	0.643938	0.500326
BP	response to decreased oxygen levels	2	0.643938	0.500326
BP	negative regulation of organelle organization	2	0.645312	0.501858
BP	eye morphogenesis	1	0.645442	0.502423
BP	neurotransmitter secretion	1	0.645668	0.50484
BP	membrane lipid biosynthetic process	1	0.645668	0.50484
BP	actin filament bundle organization	1	0.645668	0.50484
BP	signal release from synapse	1	0.645668	0.50484
BP	regulation of endothelial cell proliferation	1	0.645668	0.507244
BP	sprouting angiogenesis	1	0.645668	0.507244
BP	regulation of acute inflammatory response	1	0.645668	0.507244
BP	nucleosome assembly	1	0.645668	0.507244
BP	positive regulation of synaptic transmission	1	0.645668	0.507244
BP	negative regulation of cellular response to growth factor stimulus	1	0.645668	0.507244
BP	positive regulation of cell projection organization	2	0.645982	0.507956
BP	positive regulation of epithelial cell migration	1	0.647528	0.509637
BP	epidermal cell differentiation	2	0.64865	0.510987
BP	morphogenesis of embryonic epithelium	1	0.649367	0.512019
BP	blood vessel endothelial cell migration	1	0.650592	0.514389
BP	anatomical structure maturation	1	0.650592	0.514389
BP	response to fibroblast growth factor	1	0.650592	0.514389
BP	regulation of cellular component size	2	0.651418	0.515511
BP	placenta development	1	0.652388	0.516747
BP	protein tetramerization	1	0.654163	0.519095
BP	regulation of purine nucleotide biosynthetic process	1	0.654163	0.519095
BP	regulation of nucleotide biosynthetic process	1	0.656512	0.521431
BP	branching morphogenesis of an epithelial tube	1	0.658842	0.523756
BP	positive regulation of protein kinase B signaling	1	0.660557	0.52607
BP	striated muscle cell development	1	0.660557	0.52607
BP	complement activation	1	0.663927	0.530664
BP	cellular response to metal ion	1	0.663927	0.530664
BP	presynaptic process involved in chemical synaptic transmission	1	0.663927	0.530664
BP	regulation of cation channel activity	1	0.663927	0.530664
BP	ossification	2	0.664831	0.531865
BP	cardiac chamber development	1	0.664984	0.532944
BP	negative regulation of cell-cell adhesion	1	0.664984	0.532944
BP	response to oxygen levels	2	0.666619	0.534799
BP	internal protein amino acid acetylation	1	0.666619	0.535214
BP	endothelial cell proliferation	1	0.67043	0.53972
BP	regulation of muscle contraction	1	0.67043	0.53972
BP	BMP signaling pathway	1	0.67043	0.53972
BP	lymphocyte activation involved in immune response	1	0.670811	0.541958
BP	pallium development	1	0.670811	0.541958
BP	regulation of actin filament polymerization	1	0.670811	0.541958
BP	fatty acid derivative metabolic process	1	0.670811	0.541958
BP	chromatin assembly	1	0.677831	0.548605
BP	negative regulation of protein transport	1	0.677831	0.548605
BP	cell maturation	1	0.679335	0.550799
BP	regulation of synapse organization	1	0.679335	0.550799
BP	regulation of cell-cell adhesion	2	0.679538	0.55214
BP	vesicle fusion	1	0.679538	0.552983
BP	positive regulation of small molecule metabolic process	1	0.679538	0.552983
BP	regulation of protein processing	1	0.679538	0.552983
BP	positive regulation of I-kappaB kinase/NF-kappaB signaling	1	0.679538	0.555156
BP	regulation of axonogenesis	1	0.679538	0.555156
BP	cellular response to interferon-gamma	1	0.679538	0.555156
BP	regulation of reactive oxygen species metabolic process	1	0.679538	0.555156
BP	electron transport chain	1	0.679538	0.557319
BP	regulation of synaptic plasticity	1	0.679538	0.557319
BP	negative regulation of canonical Wnt signaling pathway	1	0.679538	0.557319
BP	regulation of protein maturation	1	0.679538	0.557319
BP	negative regulation of establishment of protein localization	1	0.679538	0.557319
BP	positive regulation of cell adhesion	2	0.679554	0.557821
BP	positive regulation of Wnt signaling pathway	1	0.680372	0.559472
BP	muscle cell development	1	0.680372	0.559472
BP	striated muscle contraction	1	0.681123	0.561614
BP	negative regulation of cell growth	1	0.681123	0.561614
BP	positive regulation of binding	1	0.681123	0.561614
BP	response to steroid hormone	2	0.681123	0.562049
BP	regulation of cytokine secretion	1	0.68199	0.563746
BP	organelle membrane fusion	1	0.68199	0.563746
BP	aminoglycan metabolic process	1	0.68264	0.565867
BP	receptor metabolic process	1	0.68264	0.565867
BP	cellular respiration	1	0.68264	0.565867
BP	positive regulation of catabolic process	2	0.68264	0.566248
BP	extracellular structure organization	2	0.683727	0.567641
BP	regulation of intracellular transport	2	0.684808	0.569031
BP	actin filament polymerization	1	0.687992	0.572171
BP	nucleosome organization	1	0.688707	0.574253
BP	positive regulation of peptidyl-tyrosine phosphorylation	1	0.688707	0.574253
BP	regulation of synapse structure or activity	1	0.688707	0.574253
BP	vesicle organization	2	0.694326	0.580039
BP	cellular response to radiation	1	0.694326	0.580436
BP	protein activation cascade	1	0.694326	0.580436
BP	positive regulation of angiogenesis	1	0.694973	0.582478
BP	cellular response to inorganic substance	1	0.694973	0.582478
BP	negative regulation of secretion by cell	1	0.694973	0.582478
BP	regulation of mRNA catabolic process	1	0.696799	0.584509
BP	protein targeting to membrane	1	0.697415	0.586531
BP	regulation of ossification	1	0.697415	0.586531
BP	cartilage development	1	0.697415	0.586531
BP	positive regulation of cytokine production	2	0.698755	0.588161
BP	steroid biosynthetic process	1	0.702755	0.592539
BP	cell recognition	1	0.702755	0.592539
BP	skin development	2	0.703307	0.593512
BP	female pregnancy	1	0.703307	0.594522
BP	regulation of exocytosis	1	0.703307	0.594522
BP	bone development	1	0.705042	0.596496
BP	protein acetylation	1	0.705563	0.59846
BP	regulation of endothelial cell migration	1	0.705563	0.59846
BP	positive regulation of epithelial cell proliferation	1	0.705563	0.59846
BP	cellular calcium ion homeostasis	2	0.706932	0.600129
BP	myeloid leukocyte differentiation	1	0.70776	0.60236
BP	chromatin assembly or disassembly	1	0.70776	0.60236
BP	locomotory behavior	1	0.70776	0.60236
BP	positive regulation of intracellular protein transport	1	0.709435	0.604296
BP	regulation of purine nucleotide metabolic process	1	0.711097	0.606223
BP	pattern specification process	2	0.714056	0.609259
BP	immunoglobulin mediated immune response	1	0.714378	0.610048
BP	positive regulation of protein transport	2	0.714795	0.611839
BP	B cell mediated immunity	1	0.714795	0.611947
BP	cytokine secretion	1	0.714795	0.611947
BP	adenylate cyclase-modulating G-protein coupled receptor signaling pathway	1	0.7152	0.613837
BP	organelle fusion	1	0.7152	0.613837
BP	cellular response to hypoxia	1	0.7152	0.613837
BP	calcium ion homeostasis	2	0.715263	0.614406
BP	glial cell differentiation	1	0.715592	0.615718
BP	multicellular organismal signaling	1	0.715592	0.615718
BP	cellular response to acid chemical	1	0.717167	0.61759
BP	epithelial cell development	1	0.718131	0.619452
BP	regulation of nucleotide metabolic process	1	0.718131	0.619452
BP	positive regulation of vasculature development	1	0.719579	0.621306
BP	muscle system process	2	0.719579	0.62203
BP	Rho protein signal transduction	1	0.719579	0.623151
BP	signal release	2	0.719579	0.62329
BP	regulation of membrane potential	2	0.719579	0.62329
BP	negative regulation of Wnt signaling pathway	1	0.721849	0.626814
BP	cellular response to decreased oxygen levels	1	0.721849	0.626814
BP	negative regulation of neuron differentiation	1	0.721849	0.626814
BP	anterior/posterior pattern specification	1	0.724825	0.630442
BP	negative regulation of secretion	1	0.724825	0.630442
BP	regulation of protein binding	1	0.726295	0.632243
BP	DNA packaging	1	0.727753	0.634035
BP	cellular protein complex disassembly	1	0.73063	0.637593
BP	positive regulation of T cell activation	1	0.73063	0.637593
BP	regulation of protein polymerization	1	0.730635	0.63936
BP	regulation of protein kinase B signaling	1	0.730635	0.63936
BP	tissue homeostasis	1	0.730635	0.641118
BP	interaction with host	1	0.730635	0.641118
BP	negative regulation of apoptotic signaling pathway	1	0.730635	0.641118
BP	regulation of neuron projection development	2	0.730635	0.641802
BP	glycerolipid metabolic process	2	0.730635	0.641802
BP	establishment of organelle localization	2	0.730635	0.641802
BP	acute inflammatory response	1	0.731248	0.642867
BP	cardiac muscle tissue development	1	0.734598	0.646341
BP	axonogenesis	2	0.735672	0.647815
BP	dendrite development	1	0.737123	0.649781
BP	divalent inorganic cation transport	2	0.737123	0.651384
BP	multi-multicellular organism process	1	0.737123	0.651488
BP	T cell activation	2	0.737123	0.652568
BP	carbohydrate homeostasis	1	0.737123	0.653188
BP	glucose homeostasis	1	0.737123	0.653188
BP	positive regulation of leukocyte cell-cell adhesion	1	0.737123	0.653188
BP	dephosphorylation	2	0.737123	0.653748
BP	cellular response to oxygen levels	1	0.737123	0.654879
BP	epidermis development	2	0.737123	0.654926
BP	positive regulation of establishment of protein localization	2	0.737123	0.654926
BP	Ras protein signal transduction	2	0.737847	0.6561
BP	membrane lipid metabolic process	1	0.739652	0.658237
BP	regulation of transmembrane receptor protein serine/threonine kinase signaling pathway	1	0.740926	0.659904
BP	T cell differentiation	1	0.740993	0.661563
BP	cell junction assembly	1	0.740993	0.661563
BP	regulation of I-kappaB kinase/NF-kappaB signaling	1	0.740993	0.661563
BP	phospholipid metabolic process	2	0.744669	0.66538
BP	endothelial cell migration	1	0.745313	0.666492
BP	negative regulation of cellular catabolic process	1	0.748341	0.669739
BP	regulation of endocytosis	1	0.749539	0.67135
BP	response to transforming growth factor beta	1	0.750125	0.672954
BP	regulation of muscle system process	1	0.750125	0.672954
BP	regulation of ion transmembrane transporter activity	1	0.7507	0.67455
BP	protein acylation	1	0.7507	0.67455
BP	leukocyte differentiation	2	0.751927	0.676701
BP	protein localization to plasma membrane	1	0.751927	0.677719
BP	autophagy	2	0.751927	0.677816
BP	process utilizing autophagic mechanism	2	0.751927	0.677816
BP	regulation of peptidyl-tyrosine phosphorylation	1	0.752614	0.679292
BP	G-protein coupled receptor signaling pathway, coupled to cyclic nucleotide second messenger	1	0.752614	0.680857
BP	telencephalon development	1	0.752614	0.680857
BP	protein autophosphorylation	1	0.752614	0.680857
BP	neutrophil degranulation	2	0.752614	0.681143
BP	regulation of transmembrane transporter activity	1	0.753246	0.683965
BP	neutrophil activation involved in immune response	2	0.753246	0.684442
BP	regulation of anatomical structure size	2	0.753246	0.684442
BP	heart morphogenesis	1	0.753246	0.685508
BP	cell-cell junction organization	1	0.753246	0.685508
BP	positive regulation of protein secretion	1	0.753246	0.685508
BP	connective tissue development	1	0.753246	0.685508
BP	positive regulation of intracellular transport	1	0.754337	0.687044
BP	learning or memory	1	0.755418	0.688572
BP	negative regulation of cytokine production	1	0.75741	0.693112
BP	negative regulation of growth	1	0.75741	0.693112
BP	glycerophospholipid biosynthetic process	1	0.75741	0.693112
BP	regulation of Ras protein signal transduction	1	0.75741	0.693112
BP	positive regulation of DNA binding transcription factor activity	1	0.75741	0.693112
BP	protein-containing complex localization	1	0.757856	0.694611
BP	protein kinase B signaling	1	0.757856	0.694611
BP	meiotic cell cycle	1	0.758513	0.696102
BP	Wnt signaling pathway	2	0.758513	0.696304
BP	neurotransmitter transport	1	0.759315	0.697586
BP	cell-cell signaling by wnt	2	0.759629	0.698422
BP	reactive oxygen species metabolic process	1	0.76292	0.701997
BP	positive regulation of cell-cell adhesion	1	0.763689	0.704901
BP	regulation of transporter activity	1	0.763689	0.704901
BP	protein-DNA complex assembly	1	0.763689	0.704901
BP	sensory organ morphogenesis	1	0.763689	0.704901
BP	regulation of protein stability	1	0.765612	0.707778
BP	membrane fusion	1	0.765612	0.707778
BP	I-kappaB kinase/NF-kappaB signaling	1	0.769625	0.712041
BP	regulation of canonical Wnt signaling pathway	1	0.770547	0.713449
BP	positive regulation of peptide secretion	1	0.772063	0.716243
BP	negative regulation of neurogenesis	1	0.772063	0.716243
BP	positive regulation of neuron projection development	1	0.772063	0.71763
BP	regulation of intracellular protein transport	1	0.772063	0.71763
BP	gliogenesis	1	0.772063	0.71763
BP	regulation of hormone secretion	1	0.77295	0.71901
BP	regulation of cellular response to growth factor stimulus	1	0.776758	0.723112
BP	protein localization to cell periphery	1	0.777612	0.724466
BP	negative regulation of catabolic process	1	0.780724	0.728488
BP	stem cell differentiation	1	0.780724	0.728488
BP	striated muscle cell differentiation	1	0.781544	0.729816
BP	cell junction organization	1	0.782357	0.731138
BP	B cell activation	1	0.783161	0.732453
BP	protein polymerization	1	0.788112	0.73765
BP	cognition	1	0.788877	0.738934
BP	negative regulation of nervous system development	1	0.79099	0.741482
BP	lipid modification	1	0.795129	0.746506
BP	protein-DNA complex subunit organization	1	0.795129	0.746506
BP	nucleic acid phosphodiester bond hydrolysis	1	0.797155	0.748982
BP	phospholipid biosynthetic process	1	0.800447	0.75265
BP	regulation of mRNA metabolic process	1	0.802403	0.755067
BP	defense response to bacterium	1	0.803717	0.75746
BP	DNA conformation change	1	0.803717	0.75746
BP	macroautophagy	1	0.805616	0.75983
BP	gene silencing by miRNA	1	0.806249	0.761006
BP	camera-type eye development	1	0.806878	0.763341
BP	establishment of protein localization to membrane	1	0.806878	0.763341
BP	regulation of leukocyte cell-cell adhesion	1	0.806878	0.763341
BP	protein polyubiquitination	1	0.808094	0.765655
BP	regulation of cation transmembrane transport	1	0.808094	0.765655
BP	posttranscriptional gene silencing by RNA	1	0.811096	0.769082
BP	posttranscriptional gene silencing	1	0.811674	0.770214
BP	response to light stimulus	1	0.812244	0.77134
BP	hormone secretion	1	0.81515	0.774686
BP	regulation of autophagy	1	0.817382	0.777983
BP	positive regulation of lymphocyte activation	1	0.817382	0.777983
BP	adaptive immune response based on somatic recombination of immune receptors built from immunoglobulin superfamily domains	1	0.817809	0.779071
BP	in utero embryonic development	1	0.817809	0.780154
BP	canonical Wnt signaling pathway	1	0.817809	0.780154
BP	lymphocyte mediated immunity	1	0.818322	0.781232
BP	epithelial tube morphogenesis	1	0.821058	0.784435
BP	viral life cycle	1	0.821546	0.785492
BP	regulation of T cell activation	1	0.822027	0.786544
BP	lymphocyte differentiation	1	0.832524	0.797786
BP	gene silencing by RNA	1	0.832524	0.797786
BP	leukocyte cell-cell adhesion	1	0.832934	0.798778
BP	transmembrane receptor protein serine/threonine kinase signaling pathway	1	0.835382	0.801727
BP	multicellular organismal homeostasis	1	0.836529	0.804633
BP	modulation of chemical synaptic transmission	1	0.836529	0.804633
BP	regulation of trans-synaptic signaling	1	0.836529	0.804633
BP	eye development	1	0.843112	0.812178
BP	positive regulation of neuron differentiation	1	0.843112	0.812178
BP	positive regulation of leukocyte activation	1	0.844392	0.814018
BP	mRNA catabolic process	1	0.84471	0.814932
BP	regulation of binding	1	0.846892	0.817647
BP	muscle cell differentiation	1	0.847189	0.818543
BP	positive regulation of cell activation	1	0.851125	0.822958
BP	positive regulation of secretion by cell	1	0.855824	0.828117
BP	glycerophospholipid metabolic process	1	0.856061	0.828962
BP	forebrain development	1	0.857157	0.83064
BP	regulation of lipid metabolic process	1	0.858235	0.832302
BP	striated muscle tissue development	1	0.860973	0.835578
BP	positive regulation of cell cycle	1	0.86446	0.839584
BP	peptidyl-tyrosine phosphorylation	1	0.864632	0.840373
BP	RNA catabolic process	1	0.865764	0.842719
BP	peptidyl-tyrosine modification	1	0.865764	0.842719
BP	regulation of apoptotic signaling pathway	1	0.865919	0.843493
BP	muscle tissue development	1	0.869965	0.84806
BP	positive regulation of secretion	1	0.870854	0.849553
BP	muscle organ development	1	0.871402	0.851031
BP	negative regulation of translation	1	0.871402	0.851765
BP	anatomical structure homeostasis	1	0.871402	0.852495
BP	regulation of cell growth	1	0.871402	0.853222
BP	myeloid cell differentiation	1	0.871402	0.853222
BP	regulation of immune effector process	1	0.877276	0.859605
BP	positive regulation of GTPase activity	1	0.877338	0.860297
BP	regulation of mitotic cell cycle phase transition	1	0.878095	0.861671
BP	negative regulation of cellular amide metabolic process	1	0.878838	0.863031
BP	regulation of DNA binding transcription factor activity	1	0.880923	0.865713
BP	protein targeting	1	0.884281	0.870922
BP	response to oxidative stress	1	0.884281	0.870922
BP	detection of chemical stimulus involved in sensory perception of smell	1	0.884281	0.870922
BP	negative regulation of protein phosphorylation	1	0.884282	0.871559
BP	regulation of protein secretion	1	0.885556	0.873451
BP	gene silencing	1	0.886799	0.875315
BP	positive regulation of neurogenesis	1	0.888627	0.877759
BP	regulation of protein complex assembly	1	0.892587	0.883086
BP	regulation of cell cycle phase transition	1	0.892587	0.883086
BP	response to radiation	1	0.892587	0.883664
BP	post-translational protein modification	1	0.892587	0.884239
BP	sensory perception of smell	1	0.89423	0.88651
BP	regulation of lymphocyte activation	1	0.896831	0.889834
BP	regulation of peptide secretion	1	0.896831	0.890379
BP	divalent metal ion transport	1	0.89727	0.89146
BP	positive regulation of defense response	1	0.898114	0.893062
BP	negative regulation of phosphorylation	1	0.898114	0.893591
BP	detection of chemical stimulus involved in sensory perception	1	0.901621	0.89773
BP	cell growth	1	0.902987	0.899739
BP	regulation of gene expression, epigenetic	1	0.905115	0.90268
BP	regulation of GTPase activity	1	0.905115	0.903162
BP	response to toxic substance	1	0.910525	0.909215
BP	positive regulation of nervous system development	1	0.911213	0.910558
BP	positive regulation of cell development	1	0.913615	0.913615
MF	secondary active transmembrane transporter activity	8	0.00765628	2.89786e-05
MF	anion transmembrane transporter activity	9	0.00765628	5.39175e-05
MF	active transmembrane transporter activity	9	0.00913379	9.64837e-05
MF	carboxylic acid binding	6	0.0225956	0.000376129
MF	organic acid binding	6	0.0225956	0.000397809
MF	solute:sodium symporter activity	4	0.026463	0.000575829
MF	glucuronosyltransferase activity	3	0.026463	0.000652257
MF	antiporter activity	4	0.0274696	0.000878195
MF	UDP-glycosyltransferase activity	5	0.0274696	0.00089142
MF	organic anion transmembrane transporter activity	6	0.0274696	0.00102941
MF	organic acid transmembrane transporter activity	5	0.0274696	0.00116069
MF	carboxylic acid transmembrane transporter activity	5	0.0274696	0.00116069
MF	inorganic anion transmembrane transporter activity	5	0.0324638	0.00148602
MF	solute:cation symporter activity	4	0.0389837	0.00192173
MF	carbon-carbon lyase activity	3	0.0451396	0.00238413
MF	transferase activity, transferring glycosyl groups	6	0.0532012	0.00299725
MF	cadherin binding involved in cell-cell adhesion	2	0.0648273	0.00402526
MF	transferase activity, transferring hexosyl groups	5	0.0648273	0.00410877
MF	solute:proton antiporter activity	2	0.0666351	0.00445798
MF	vitamin binding	4	0.0728762	0.00513213
MF	symporter activity	4	0.0748599	0.00553542
MF	sodium ion transmembrane transporter activity	4	0.113262	0.00877383
MF	organic acid:sodium symporter activity	2	0.122002	0.00988043
MF	cell-cell adhesion mediator activity	2	0.124578	0.0105277
MF	lyase activity	4	0.137291	0.0125771
MF	solute:cation antiporter activity	2	0.137291	0.0125784
MF	monovalent inorganic cation transmembrane transporter activity	6	0.137291	0.0133411
MF	drug transmembrane transporter activity	3	0.137291	0.0135357
MF	monooxygenase activity	3	0.139838	0.0142793
MF	protein phosphatase inhibitor activity	2	0.139998	0.0147885
MF	dicarboxylic acid transmembrane transporter activity	2	0.142547	0.0155597
MF	phosphatase inhibitor activity	2	0.145088	0.0163479
MF	cell adhesion mediator activity	2	0.146031	0.0171529
MF	exopeptidase activity	3	0.146031	0.0174826
MF	oxygen binding	2	0.17383	0.0214228
MF	organic hydroxy compound transmembrane transporter activity	2	0.176116	0.0223245
MF	chemokine activity	2	0.178396	0.0232418
MF	neuropeptide receptor activity	2	0.202256	0.0270624
MF	sulfur compound binding	4	0.219531	0.0301469
MF	oxidoreductase activity, acting on CH-OH group of donors	3	0.221739	0.0316098
MF	monocarboxylic acid transmembrane transporter activity	2	0.221739	0.0321665
MF	tetrapyrrole binding	3	0.221739	0.0327923
MF	cofactor binding	6	0.228467	0.0347648
MF	metalloexopeptidase activity	2	0.228467	0.0353962
MF	amino acid binding	2	0.230354	0.0364997
MF	ion antiporter activity	2	0.232012	0.0376163
MF	hydrolase activity, acting on carbon-nitrogen (but not peptide) bonds	3	0.232012	0.0383963
MF	chemokine receptor binding	2	0.241463	0.0410438
MF	oxidoreductase activity, acting on paired donors, with incorporation or reduction of molecular oxygen	3	0.241463	0.0465777
MF	iron ion binding	3	0.241463	0.0472955
MF	serine-type peptidase activity	4	0.241463	0.0485084
MF	sodium:phosphate symporter activity	1	0.241463	0.0490649
MF	urate transmembrane transporter activity	1	0.241463	0.0490649
MF	sodium:dicarboxylate symporter activity	1	0.241463	0.0490649
MF	cobalamin binding	1	0.241463	0.0490649
MF	nucleoside-triphosphate diphosphatase activity	1	0.241463	0.0490649
MF	salt transmembrane transporter activity	1	0.241463	0.0490649
MF	serine hydrolase activity	4	0.241463	0.0512264
MF	protein serine/threonine phosphatase inhibitor activity	1	0.241463	0.0538385
MF	galanin receptor activity	1	0.241463	0.0538385
MF	hydrolase activity, acting on carbon-nitrogen (but not peptide) bonds, in linear amidines	1	0.241463	0.0538385
MF	calcium channel inhibitor activity	1	0.241463	0.0538385
MF	alpha-catenin binding	1	0.241463	0.0538385
MF	modified amino acid binding	2	0.241463	0.0545479
MF	protein phosphatase regulator activity	2	0.241463	0.058469
MF	arylsulfatase activity	1	0.241463	0.0585884
MF	folic acid binding	1	0.241463	0.0585884
MF	ATPase-coupled anion transmembrane transporter activity	1	0.241463	0.0585884
MF	alditol:NADP+ 1-oxidoreductase activity	1	0.241463	0.0633148
MF	phosphate ion transmembrane transporter activity	1	0.241463	0.0633148
MF	secondary active monocarboxylate transmembrane transporter activity	1	0.241463	0.0633148
MF	carbon-nitrogen lyase activity	1	0.241463	0.0633148
MF	chloride channel activity	2	0.241463	0.063844
MF	metallopeptidase activity	3	0.241463	0.0644434
MF	amide binding	4	0.241463	0.06796
MF	cargo receptor activity	2	0.241463	0.0679807
MF	low-density lipoprotein particle receptor activity	1	0.241463	0.0680177
MF	monovalent cation:proton antiporter activity	1	0.241463	0.0680177
MF	dopamine binding	1	0.241463	0.0680177
MF	modified amino acid transmembrane transporter activity	1	0.241463	0.0680177
MF	potassium ion binding	1	0.247705	0.0726972
MF	phosphatase regulator activity	2	0.247705	0.0765103
MF	nucleotide diphosphatase activity	1	0.247705	0.0773535
MF	protein tag	1	0.247705	0.0773535
MF	metal ion transmembrane transporter activity	5	0.247705	0.079746
MF	chloride transmembrane transporter activity	2	0.247705	0.0808963
MF	icosanoid receptor activity	1	0.247705	0.0819867
MF	transmembrane-ephrin receptor activity	1	0.247705	0.0819867
MF	sulfuric ester hydrolase activity	1	0.247705	0.0819867
MF	low-density lipoprotein particle binding	1	0.247705	0.0819867
MF	lipoprotein particle receptor activity	1	0.247705	0.0819867
MF	Rac guanyl-nucleotide exchange factor activity	1	0.247705	0.0819867
MF	myosin V binding	1	0.247705	0.0819867
MF	CXCR chemokine receptor binding	1	0.247705	0.0819867
MF	anion channel activity	2	0.248419	0.0838629
MF	retinoic acid binding	1	0.248419	0.0865969
MF	carbohydrate:cation symporter activity	1	0.248419	0.0865969
MF	bile acid transmembrane transporter activity	1	0.248419	0.0865969
MF	racemase and epimerase activity	1	0.248419	0.0865969
MF	ephrin receptor activity	1	0.256399	0.0911843
MF	metalloaminopeptidase activity	1	0.256399	0.0911843
MF	glycosaminoglycan binding	3	0.258835	0.0937164
MF	alkali metal ion binding	1	0.258835	0.0957488
MF	pattern binding	1	0.258835	0.100291
MF	glucose transmembrane transporter activity	1	0.258835	0.100291
MF	transaminase activity	1	0.258835	0.100291
MF	polysaccharide binding	1	0.258835	0.100291
MF	proteasome binding	1	0.258835	0.100291
MF	catecholamine binding	1	0.258835	0.100291
MF	structural constituent of cytoskeleton	2	0.258835	0.100744
MF	zinc ion transmembrane transporter activity	1	0.258835	0.10481
MF	hyaluronic acid binding	1	0.258835	0.10481
MF	alcohol dehydrogenase (NADP+) activity	1	0.258835	0.10481
MF	hexose transmembrane transporter activity	1	0.258835	0.10481
MF	carbohydrate kinase activity	1	0.258835	0.10481
MF	insulin receptor binding	1	0.265326	0.109307
MF	transferase activity, transferring nitrogenous groups	1	0.265326	0.109307
MF	monosaccharide transmembrane transporter activity	1	0.273847	0.113781
MF	oxidoreductase activity, acting on the CH-OH group of donors, NAD or NADP as acceptor	2	0.277604	0.121778
MF	CoA-ligase activity	1	0.277604	0.122664
MF	oxidoreductase activity, acting on single donors with incorporation of molecular oxygen, incorporation of two atoms of oxygen	1	0.277604	0.122664
MF	lipoprotein particle receptor binding	1	0.277604	0.122664
MF	FAD binding	1	0.277604	0.122664
MF	divalent inorganic cation transmembrane transporter activity	1	0.277604	0.122664
MF	serine-type endopeptidase activity	3	0.277604	0.125241
MF	oxidoreductase activity, acting on single donors with incorporation of molecular oxygen	1	0.277604	0.127072
MF	peptide antigen binding	1	0.277604	0.127072
MF	ephrin receptor binding	1	0.277604	0.127072
MF	lipoprotein particle binding	1	0.277604	0.127072
MF	protein-lipid complex binding	1	0.277604	0.127072
MF	proton transmembrane transporter activity	2	0.278614	0.130135
MF	metallocarboxypeptidase activity	1	0.278614	0.131459
MF	oxidoreductase activity, acting on the CH-NH group of donors	1	0.278614	0.131459
MF	sugar transmembrane transporter activity	1	0.278614	0.131459
MF	RNA polymerase II transcription corepressor activity	1	0.28363	0.135823
MF	aldo-keto reductase (NADP) activity	1	0.28363	0.135823
MF	heme binding	2	0.283824	0.136915
MF	cation:cation antiporter activity	1	0.286382	0.140166
MF	acid-thiol ligase activity	1	0.286382	0.140166
MF	G-protein coupled peptide receptor activity	2	0.28896	0.143772
MF	anion:anion antiporter activity	1	0.28896	0.144487
MF	sulfur compound transmembrane transporter activity	1	0.28896	0.144487
MF	peptide receptor activity	2	0.28896	0.145498
MF	carbohydrate binding	3	0.291993	0.149291
MF	G-protein coupled receptor binding	3	0.291993	0.152843
MF	inorganic anion exchanger activity	1	0.291993	0.153065
MF	sodium-independent organic anion transmembrane transporter activity	1	0.291993	0.153065
MF	peptide binding	3	0.291993	0.155227
MF	phospholipase A2 activity	1	0.291993	0.157323
MF	retinoid binding	1	0.291993	0.157323
MF	chemoattractant activity	1	0.291993	0.157323
MF	calcium channel regulator activity	1	0.291993	0.161559
MF	steroid hydroxylase activity	1	0.291993	0.161559
MF	neutral amino acid transmembrane transporter activity	1	0.291993	0.161559
MF	oxidoreductase activity, acting on the aldehyde or oxo group of donors, NAD or NADP as acceptor	1	0.291993	0.161559
MF	hydrolase activity, acting on carbon-nitrogen (but not peptide) bonds, in cyclic amidines	1	0.291993	0.161559
MF	isoprenoid binding	1	0.291993	0.161559
MF	coenzyme binding	3	0.291993	0.162447
MF	ion channel inhibitor activity	1	0.292421	0.165774
MF	carboxy-lyase activity	1	0.292421	0.165774
MF	deaminase activity	1	0.292421	0.165774
MF	channel inhibitor activity	1	0.297968	0.169968
MF	carbohydrate transmembrane transporter activity	1	0.303411	0.174141
MF	ligase activity, forming carbon-sulfur bonds	1	0.313992	0.182425
MF	transition metal ion transmembrane transporter activity	1	0.313992	0.182425
MF	glutamate receptor binding	1	0.317223	0.186536
MF	CCR chemokine receptor binding	1	0.317223	0.186536
MF	heparin binding	2	0.317878	0.18804
MF	aminopeptidase activity	1	0.330084	0.198748
MF	carboxypeptidase activity	1	0.330084	0.198748
MF	oxidoreductase activity, acting on paired donors, with incorporation or reduction of molecular oxygen, NAD(P)H as one donor, and incorporation of one atom of oxygen	1	0.330084	0.198748
MF	oxidoreductase activity, acting on the aldehyde or oxo group of donors	1	0.33482	0.202778
MF	structural constituent of muscle	1	0.339467	0.206788
MF	endopeptidase activity	4	0.341609	0.209296
MF	acetylgalactosaminyltransferase activity	1	0.354917	0.218699
MF	cadherin binding	3	0.356207	0.220748
MF	transcriptional repressor activity, RNA polymerase II transcription factor binding	1	0.357214	0.22263
MF	cell adhesion molecule binding	4	0.361564	0.229426
MF	sulfotransferase activity	1	0.361564	0.230433
MF	transferase activity, transferring pentosyl groups	1	0.361564	0.230433
MF	manganese ion binding	1	0.361564	0.230433
MF	pyridoxal phosphate binding	1	0.363622	0.234306
MF	vitamin B6 binding	1	0.363622	0.234306
MF	scavenger receptor activity	1	0.365606	0.238159
MF	calcium-dependent phospholipid binding	1	0.365606	0.238159
MF	protein heterodimerization activity	4	0.368442	0.241304
MF	NAD binding	1	0.379078	0.249604
MF	magnesium ion binding	2	0.382344	0.256184
MF	L-amino acid transmembrane transporter activity	1	0.382344	0.25714
MF	GDP binding	1	0.382344	0.25714
MF	calcium-dependent protein binding	1	0.382344	0.25714
MF	acetylglucosaminyltransferase activity	1	0.383204	0.260879
MF	voltage-gated ion channel activity	2	0.383204	0.261766
MF	voltage-gated channel activity	2	0.383204	0.261766
MF	monocarboxylic acid binding	1	0.385367	0.2646
MF	myosin binding	1	0.394104	0.271987
MF	transmembrane receptor protein tyrosine kinase activity	1	0.407878	0.28293
MF	Rac GTPase binding	1	0.410998	0.286541
MF	monosaccharide binding	1	0.419164	0.29371
MF	cytokine activity	2	0.424515	0.298954
MF	transferase activity, transferring sulfur-containing groups	1	0.425021	0.300807
MF	clathrin binding	1	0.432797	0.307834
MF	virus receptor activity	1	0.433409	0.311322
MF	hijacked molecular function	1	0.433409	0.311322
MF	ammonium ion binding	1	0.436101	0.314792
MF	phosphoprotein binding	1	0.438088	0.318244
MF	transcription corepressor activity	2	0.438088	0.31931
MF	exonuclease activity	1	0.44176	0.325098
MF	Rho guanyl-nucleotide exchange factor activity	1	0.44176	0.325098
MF	flavin adenine dinucleotide binding	1	0.442151	0.328499
MF	ATPase binding	1	0.442151	0.328499
MF	amino acid transmembrane transporter activity	1	0.448243	0.335251
MF	actin binding	3	0.448243	0.336182
MF	transmembrane receptor protein kinase activity	1	0.453784	0.341936
MF	PDZ domain binding	1	0.469071	0.355106
MF	phosphoric diester hydrolase activity	1	0.481644	0.368017
MF	dioxygenase activity	1	0.481644	0.368017
MF	steroid binding	1	0.483587	0.371204
MF	syntaxin binding	1	0.485491	0.374375
MF	ion channel regulator activity	1	0.487358	0.377531
MF	microtubule binding	2	0.499032	0.388331
MF	phospholipase activity	1	0.502853	0.393075
MF	RNA polymerase II transcription cofactor activity	1	0.508379	0.399185
MF	cytokine receptor binding	2	0.51255	0.404265
MF	metalloendopeptidase activity	1	0.541282	0.428832
MF	ATPase activity, coupled to transmembrane movement of substances	1	0.556828	0.443109
MF	integrin binding	1	0.561395	0.448721
MF	primary active transmembrane transporter activity	1	0.576956	0.465222
MF	P-P-bond-hydrolysis-driven transmembrane transporter activity	1	0.576956	0.465222
MF	SNARE binding	1	0.585871	0.47595
MF	lipase activity	1	0.585871	0.478599
MF	ATPase activity, coupled to movement of substances	1	0.585871	0.478599
MF	channel regulator activity	1	0.59611	0.489062
MF	lipid transporter activity	1	0.602921	0.496773
MF	ion gated channel activity	2	0.608293	0.503341
MF	gated channel activity	2	0.610384	0.508099
MF	transcriptional repressor activity, RNA polymerase II proximal promoter sequence-specific DNA binding	1	0.610384	0.50937
MF	carboxylic ester hydrolase activity	1	0.613727	0.514321
MF	tubulin binding	2	0.623244	0.526836
MF	isomerase activity	1	0.623244	0.528879
MF	mRNA binding involved in posttranscriptional gene silencing	1	0.623244	0.528879
MF	ligase activity	1	0.648025	0.552191
MF	GTP binding	2	0.650976	0.556997
MF	purine ribonucleoside binding	2	0.653438	0.561405
MF	purine nucleoside binding	2	0.654854	0.565781
MF	ribonucleoside binding	2	0.654854	0.567233
MF	nucleoside binding	2	0.663779	0.577301
MF	Rho GTPase binding	1	0.664401	0.580798
MF	actin filament binding	1	0.664401	0.582922
MF	guanyl ribonucleotide binding	2	0.664401	0.585795
MF	guanyl nucleotide binding	2	0.664401	0.587199
MF	enzyme inhibitor activity	2	0.664916	0.589996
MF	antigen binding	1	0.672619	0.599537
MF	protein tyrosine kinase activity	1	0.672619	0.601568
MF	transcription factor activity, RNA polymerase II transcription factor binding	1	0.685495	0.615498
MF	transcription factor activity, RNA polymerase II proximal promoter sequence-specific DNA binding	2	0.687646	0.61985
MF	ion channel activity	2	0.697933	0.63158
MF	substrate-specific channel activity	2	0.713337	0.648031
MF	nuclease activity	1	0.715702	0.6527
MF	transferase activity, transferring one-carbon groups	1	0.734686	0.678245
MF	ubiquitin protein ligase activity	1	0.734686	0.678245
MF	channel activity	2	0.734686	0.679207
MF	passive transmembrane transporter activity	2	0.734686	0.680361
MF	ubiquitin-like protein ligase activity	1	0.736485	0.68634
MF	receptor ligand activity	2	0.736485	0.687213
MF	transcriptional repressor activity, RNA polymerase II transcription regulatory region sequence-specific DNA binding	1	0.739543	0.692671
MF	Ras guanyl-nucleotide exchange factor activity	1	0.761576	0.718197
MF	receptor regulator activity	2	0.761576	0.71867
MF	transcriptional activator activity, RNA polymerase II proximal promoter sequence-specific DNA binding	1	0.799205	0.756994
MF	GTPase activity	1	0.817531	0.77723
MF	ubiquitin protein ligase binding	1	0.829544	0.791572
MF	guanyl-nucleotide exchange factor activity	1	0.838474	0.805001
MF	ubiquitin-like protein ligase binding	1	0.838474	0.805998
MF	mRNA binding	1	0.864978	0.834521
MF	phosphoric ester hydrolase activity	1	0.869552	0.841996
MF	ATPase activity, coupled	1	0.880005	0.855216
MF	phospholipid binding	1	0.897353	0.875291
MF	transcriptional activator activity, RNA polymerase II transcription regulatory region sequence-specific DNA binding	1	0.897353	0.879709
MF	olfactory receptor activity	1	0.897353	0.881554
MF	RNA polymerase II proximal promoter sequence-specific DNA binding	1	0.904232	0.891496
MF	ubiquitin-protein transferase activity	1	0.904819	0.896954
MF	proximal promoter sequence-specific DNA binding	1	0.904819	0.89958
MF	ATPase activity	1	0.904819	0.901634
MF	ubiquitin-like protein transferase activity	1	0.909907	0.909907
